# Supplementary material for: Photophysical studies of diazines: effects of solvents and complexation with Cu2+, Ni2+, Co2+ and Pb2+ ions
Source: Royal Society of Chemistry journal article supplement (doi:10.1039/d6ra00637j), 2026-04-17
Supplement: d6ra00637j1.pdf [file d6ra00637j1.pdf]

## Photophysical studies of diazines: Effect of solvent and complexation with $\text{Cu}^{2+}$ , $\text{Ni}^{2+}$ , $\text{Co}^{2+}$ and $\text{Pb}^{2+}$ ions

Packirisamy Kuzhalmozhi Madarasi<sup>a</sup> and Chinnappan Sivasankar\*<sup>a</sup>

<sup>a</sup> Catalysis and Energy Laboratory, Department of Chemistry, Pondicherry University (A Central University),  
Puducherry 605014, India.

### Table of Contents

|                                                                                                                    |           |
|--------------------------------------------------------------------------------------------------------------------|-----------|
| 1. Figure S1. Absorption spectra of <b>1</b> after the addition of metal ion at different concentrations.....      | S2 – S3   |
| 2. Figure S2. Optimized geometries of diazines <b>1</b> – <b>4</b> using CAM-B3LYP theory in gas phase...S4        |           |
| 3. Figure S3. Optimized geometries of diazines <b>1</b> – <b>4</b> using CAM-B3LYP theory in hexane.....S4         |           |
| 4. Figure S4. Simulated UV-Vis spectrum of <b>1</b> – <b>4</b> using different solvent systems.....S5 – S6         |           |
| 5. Figure S5. Simulated UV-Vis spectrum of <b>1</b> – <b>4</b> using CAM-B3LYP theory and hexane as solvent.....S7 |           |
| 6. Table S1. NBO analysis of all the system only $C_\alpha$ , $C_\beta$ , $N_\alpha$ and $N_\beta$ .....           | S7 – S8   |
| 7. Fig. S6. Possible transitions from TD-DFT calculation for the compounds in different solvent system.....        | S9 – S14  |
| 8. Table S2. Cartesian coordinates of all the systems.....                                                         | S14 – S59 |

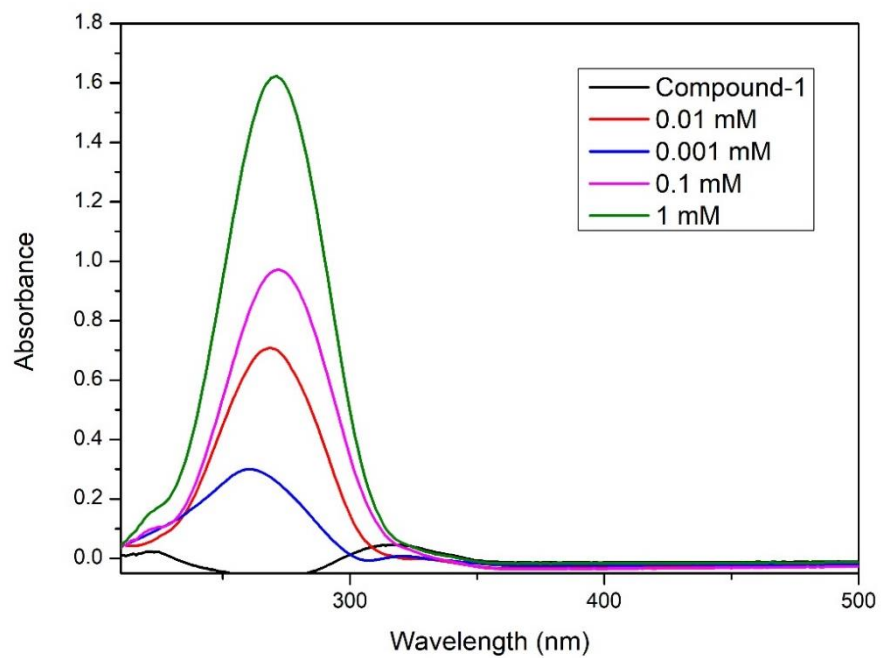

**1-Lead**

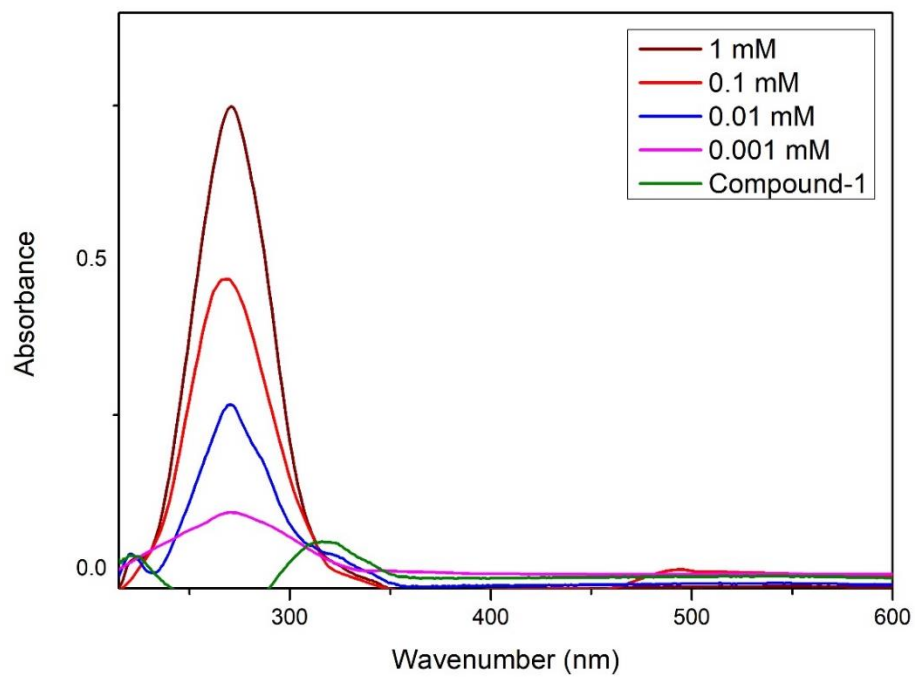

**1-Nickel**

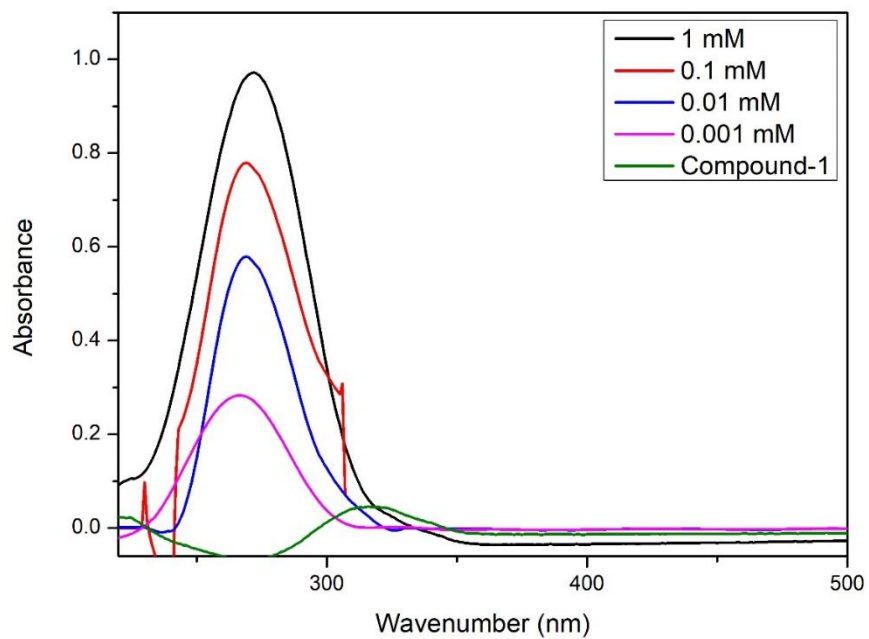

**1-Cobalt**

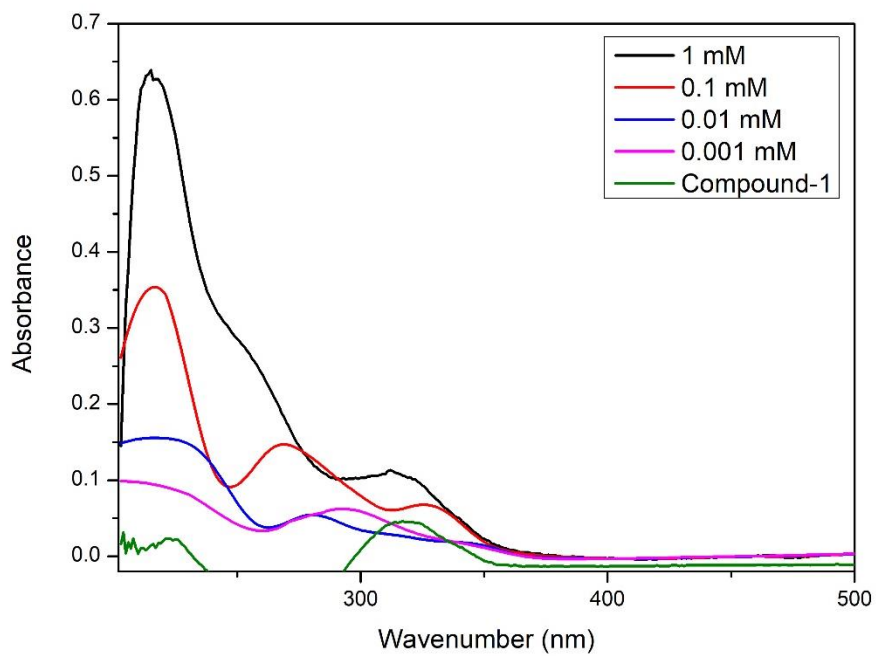

**1-Copper**

**Fig. S1.** Absorption spectra of 1 after the addition of metal ion at different concentrations.

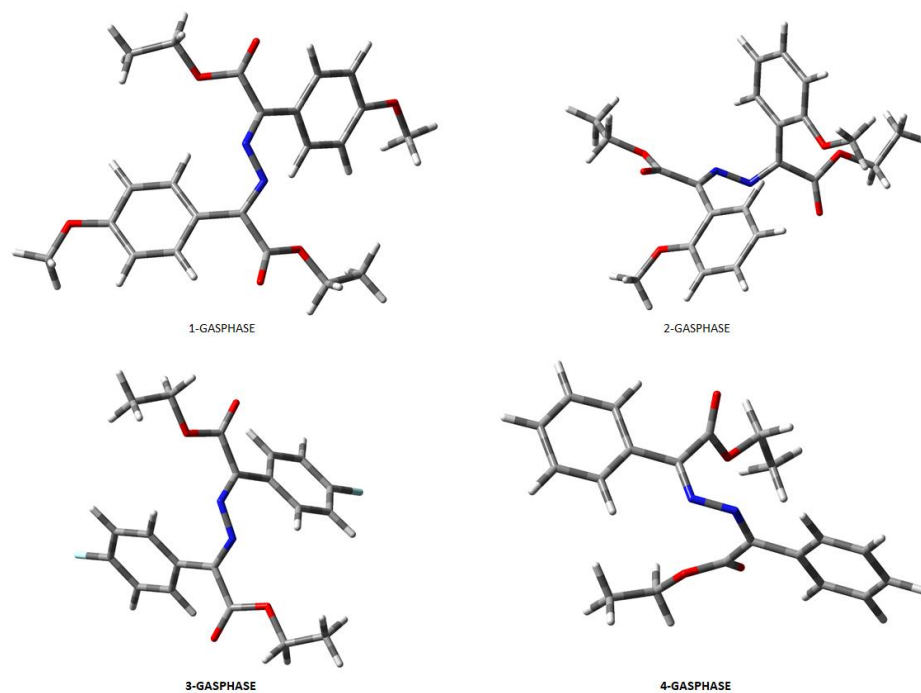

**Fig. S2.** Optimized geometries of diazines **1** – **4** using CAM-B3LYP theory in gas phase.

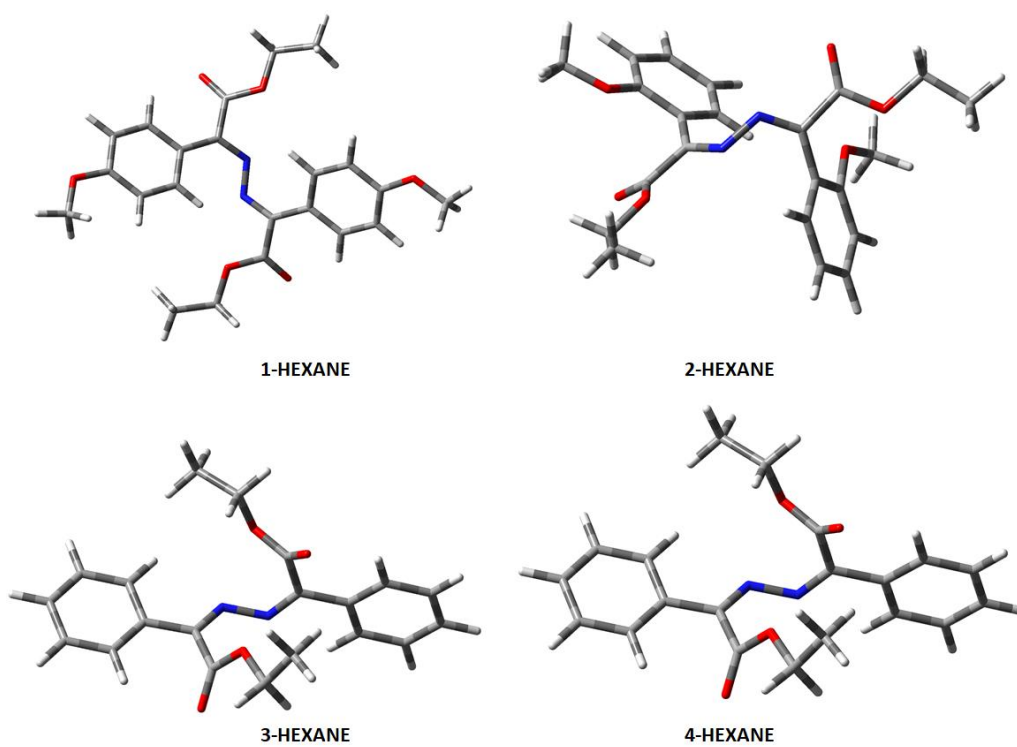

**Fig. S3.** Optimized geometries of diazines **1** – **4** using CAM-B3LYP theory in hexane.

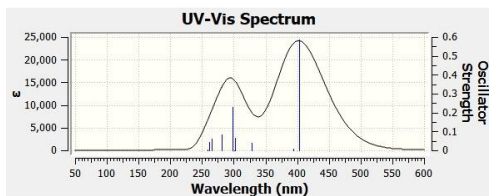

1-THF

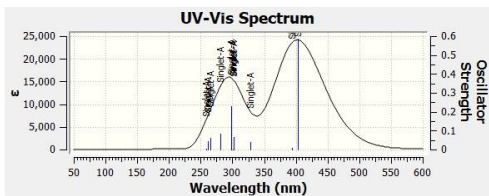

1-HEXANE

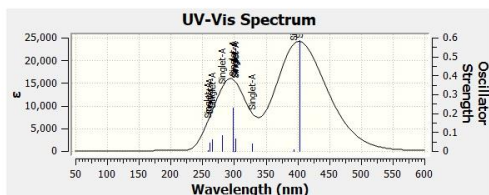

1-DMSO

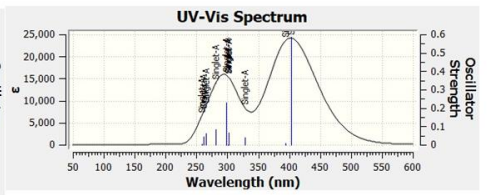

1-DCM

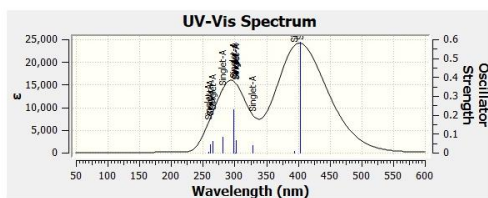

1-CH<sub>3</sub>OH

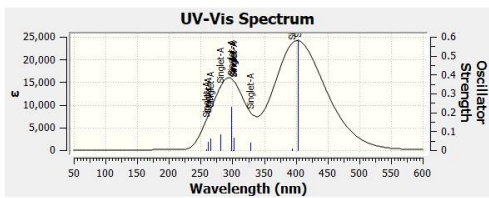

1-CH<sub>3</sub>CN

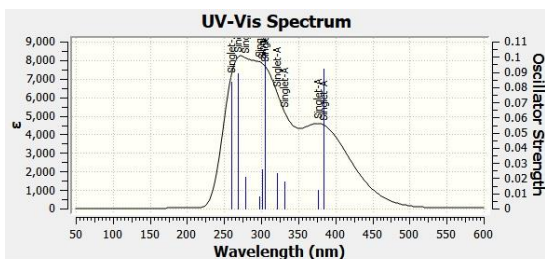

2-THF

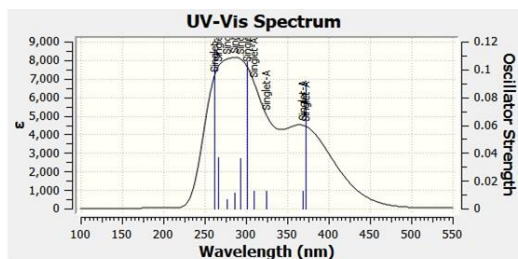

2-HEXANE

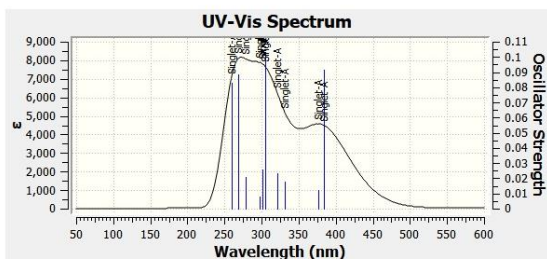

2-DMSO

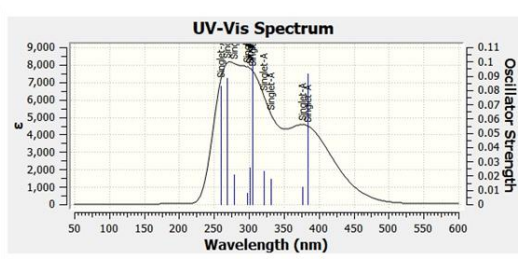

2-DCM

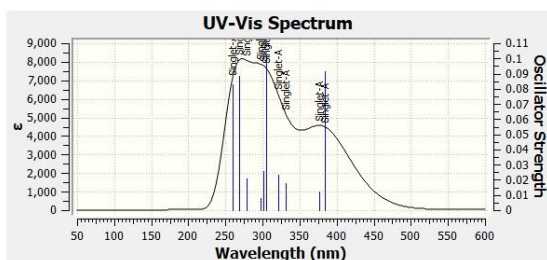

2-MeOH

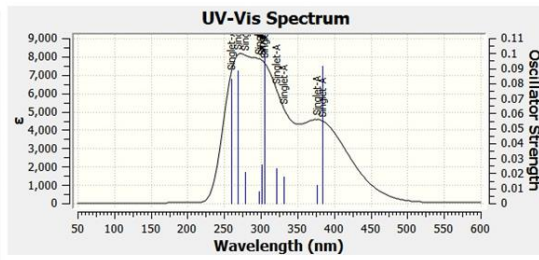

2-CH<sub>3</sub>CN

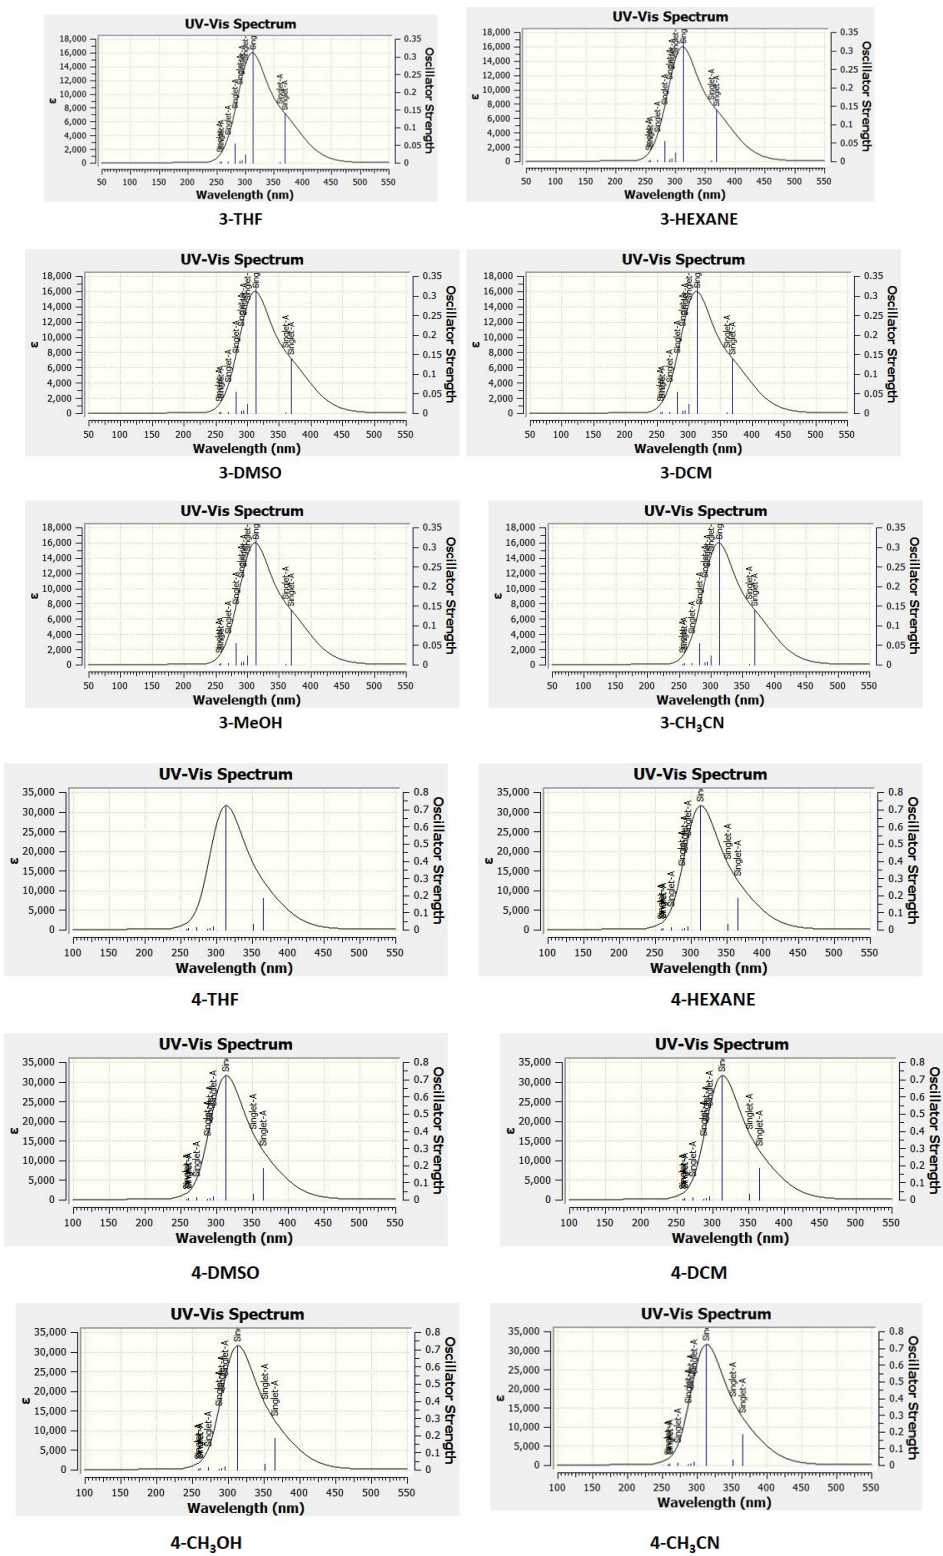

Fig. S4. Simulated UV-Vis spectrum of 1 – 4 using different solvent systems.

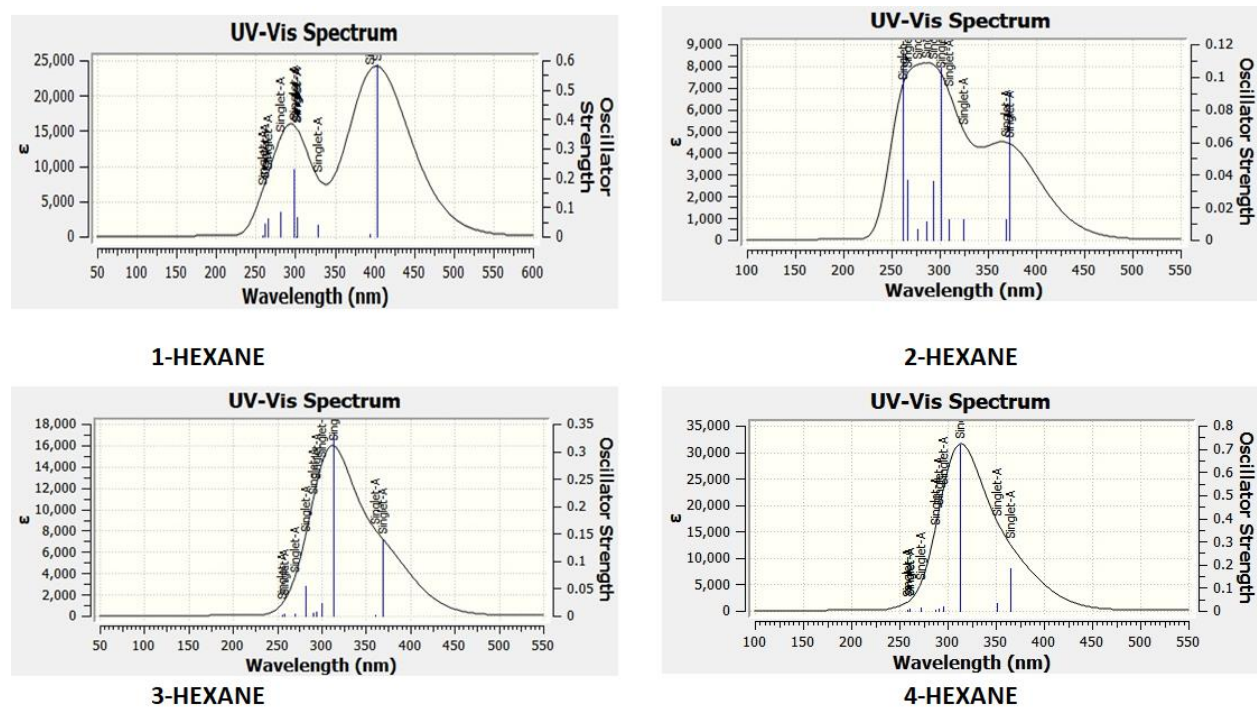

Fig. S5. Simulated UV-Vis spectrum of 1 – 4 using CAM-B3LYP theory and hexane as solvent.

Table S1. NBO analysis of all the system only  $C_\alpha$ ,  $C_\beta$ ,  $N_\alpha$  and  $N_\beta$ .

| Systems              | Bond | Population |                         | Contribution %        |            |            |           | Hybrid                                  |                                         |
|----------------------|------|------------|-------------------------|-----------------------|------------|------------|-----------|-----------------------------------------|-----------------------------------------|
|                      |      | C-N        | $C_\alpha$ - $N_\alpha$ | $C_\beta$ - $N_\beta$ | $C_\alpha$ | $N_\alpha$ | $C_\beta$ | $N_\beta$                               | C/N                                     |
| 1-MeOH               | 1    | 1.989      | 1.989                   | 40.67                 | 59.33      | 40.52      | 59.48     | $sp^{2.09}d^{0.00}/sp^{1.42}d^{0.00}$   | $sp^{2.11}d^{0.00}/sp^{1.42}d^{0.00}$   |
|                      | 2    | 1.715      | 1.715                   | 43.11                 | 56.89      | 42.87      | 57.13     | $sp^{99.99}d^{0.61}/sp^{99.99}d^{3.88}$ | $sp^{99.99}d^{0.30}/sp^{99.99}d^{0.40}$ |
| 1-CH <sub>3</sub> CN | 1    | 1.980      | 1.982                   | 40.67                 | 59.33      | 40.52      | 59.48     | $sp^{2.09}d^{0.00}/sp^{1.42}d^{0.00}$   | $sp^{2.11}d^{0.00}/sp^{1.42}d^{0.00}$   |
|                      | 2    | 1.928      | 1.924                   | 43.11                 | 56.89      | 42.87      | 57.13     | $sp^{99.99}d^{0.61}/sp^{99.99}d^{3.88}$ | $sp^{99.99}d^{0.30}/sp^{99.99}d^{0.40}$ |
| 1-DMSO               | 1    | 1.980      | 1.982                   | 40.67                 | 59.33      | 40.52      | 59.48     | $sp^{2.09}d^{0.00}/sp^{1.42}d^{0.00}$   | $sp^{2.11}d^{0.00}/sp^{1.42}d^{0.00}$   |
|                      | 2    | 1.928      | 1.922                   | 43.10                 | 56.90      | 42.86      | 57.14     | $sp^{99.99}d^{0.61}/sp^{99.99}d^{3.88}$ | $sp^{99.99}d^{0.30}/sp^{99.99}d^{0.40}$ |
| 1-DCM                | 1    | 1.980      | 1.981                   | 40.67                 | 59.33      | 40.52      | 59.48     | $sp^{2.09}d^{0.00}/sp^{1.42}d^{0.00}$   | $sp^{2.11}d^{0.00}/sp^{1.42}d^{0.00}$   |
|                      | 2    | 1.928      | 1.922                   | 43.18                 | 56.82      | 42.94      | 57.06     | $sp^{99.99}d^{0.61}/sp^{99.99}d^{3.86}$ | $sp^{99.99}d^{0.29}/sp^{99.99}d^{0.40}$ |
| 1-THF                | 1    | 1.980      | 1.981                   | 40.68                 | 59.32      | 40.52      | 59.48     | $sp^{2.09}d^{0.00}/sp^{1.42}d^{0.00}$   | $sp^{2.11}d^{0.00}/sp^{1.42}d^{0.00}$   |
|                      | 2    | 1.927      | 1.922                   | 43.19                 | 56.81      | 42.96      | 57.04     | $sp^{99.99}d^{0.60}/sp^{99.99}d^{3.85}$ | $sp^{99.99}d^{0.29}/sp^{99.99}d^{0.40}$ |
| 1-Hexane             | 1    | 1.980      | 1.981                   | 40.69                 | 59.31      | 40.55      | 59.45     | $sp^{2.09}d^{0.00}/sp^{1.42}d^{0.00}$   | $sp^{2.11}d^{0.00}/sp^{1.43}d^{0.00}$   |
|                      | 2    | 1.926      | 1.921                   | 43.35                 | 56.65      | 43.18      | 56.82     | $sp^{99.99}d^{0.61}/sp^{99.99}d^{3.90}$ | $sp^{99.99}d^{0.28}/sp^{99.99}d^{0.41}$ |
| 2-MeOH               | 1    | 1.981      | 1.982                   | 40.95                 | 59.05      | 40.95      | 59.05     | $sp^{2.07}d^{0.00}/sp^{1.48}d^{0.00}$   | $sp^{2.07}d^{0.00}/sp^{1.48}d^{0.00}$   |
|                      | 2    | 1.885      | 1.886                   | 42.26                 | 57.74      | 42.30      | 57.70     | $sp^{1.00}d^{0.00}/sp^{99.99}d^{1.92}$  | $sp^{1.00}d^{0.00}/sp^{99.99}d^{1.87}$  |
| 2-CH <sub>3</sub> CN | 1    | 1.982      | 1.982                   | 40.95                 | 59.05      | 40.95      | 59.05     | $sp^{2.07}d^{0.00}/sp^{1.48}d^{0.00}$   | $sp^{2.07}d^{0.00}/sp^{1.48}d^{0.00}$   |
|                      | 2    | 1.880      | 1.886                   | 42.26                 | 57.74      | 42.29      | 57.71     | $sp^{1.00}d^{0.00}/sp^{99.99}d^{1.92}$  | $sp^{1.00}d^{0.00}/sp^{99.99}d^{1.87}$  |
| 2-DMSO               | 1    | 1.997      | 1.968                   | 50.00                 | 50.00      | 50.21      | 49.79     | $sp^{1.40}d^{0.00}/sp^{1.40}d^{0.00}$   | $sp^{99.99}d^{0.51}/sp^{83.36}d^{0.34}$ |

|                      |   |       |       |       |       |       |       |                                          |                                          |
|----------------------|---|-------|-------|-------|-------|-------|-------|------------------------------------------|------------------------------------------|
|                      | 2 | 1.884 | 1.884 | 42.26 | 57.74 | 42.29 | 57.71 | $sp^{1.00}d^{0.00}/sp^{99.99}d^{1.92}$   | $sp^{1.00}d^{0.00}/sp^{99.99}d^{1.87}$   |
| 2-DCM                | 1 | 1.982 | 1.982 | 40.96 | 59.04 | 40.96 | 59.04 | $sp^{2.07}d^{0.00}/sp^{1.48}d^{0.00}$    | $sp^{2.07}d^{0.00}/sp^{1.48}d^{0.00}$    |
|                      | 2 | 1.885 | 1.885 | 42.35 | 57.65 | 42.41 | 57.59 | $sp^{99.99}d^{11.81}/sp^{99.99}d^{1.95}$ | $sp^{99.99}d^{13.90}/sp^{99.99}d^{1.90}$ |
| 2-THF                | 1 | 1.982 | 1.982 | 40.96 | 59.04 | 40.96 | 59.04 | $sp^{2.07}d^{0.00}/sp^{1.48}d^{0.00}$    | $sp^{2.07}d^{0.00}/sp^{1.48}d^{0.00}$    |
|                      | 2 | 1.885 | 1.885 | 42.37 | 57.63 | 42.43 | 57.57 | $sp^{99.99}d^{11.65}/sp^{99.99}d^{1.95}$ | $sp^{99.99}d^{13.69}/sp^{99.99}d^{1.91}$ |
| 2-Hexane             | 1 | 1.981 | 1.982 | 40.98 | 59.02 | 41.00 | 59.00 | $sp^{2.07}d^{0.00}/sp^{1.49}d^{0.00}$    | $sp^{2.07}d^{0.00}/sp^{1.49}d^{0.00}$    |
|                      | 2 | 1.884 | 1.884 | 42.58 | 57.42 | 42.72 | 57.28 | $sp^{99.99}d^{10.75}/sp^{99.99}d^{1.94}$ | $sp^{99.99}d^{11.38}/sp^{99.99}d^{2.01}$ |
| 3-MeOH               | 1 | 1.982 | 1.981 | 40.55 | 59.45 | 40.40 | 59.60 | $sp^{2.07}d^{0.00}/sp^{1.43}d^{0.00}$    | $sp^{2.11}d^{0.00}/sp^{1.42}d^{0.00}$    |
|                      | 2 | 1.919 | 1.920 | 43.86 | 56.14 | 43.56 | 56.44 | $sp^{99.99}d^{0.87}/sp^{99.99}d^{1.35}$  | $sp^{99.99}d^{0.42}/sp^{99.99}d^{0.56}$  |
| 3-CH <sub>3</sub> CN | 1 | 1.982 | 1.981 | 40.55 | 59.45 | 40.40 | 59.60 | $sp^{2.07}d^{0.00}/sp^{1.42}d^{0.00}$    | $sp^{2.11}d^{0.00}/sp^{1.42}d^{0.00}$    |
|                      | 2 | 1.919 | 1.920 | 43.85 | 56.15 | 43.56 | 56.44 | $sp^{99.99}d^{0.87}/sp^{99.99}d^{1.35}$  | $sp^{99.99}d^{0.42}/sp^{99.99}d^{0.56}$  |
| 3-DMSO               | 1 | 1.982 | 1.981 | 40.55 | 59.45 | 40.40 | 59.60 | $sp^{2.07}d^{0.00}/sp^{1.42}d^{0.00}$    | $sp^{2.11}d^{0.00}/sp^{1.42}d^{0.00}$    |
|                      | 2 | 1.919 | 1.920 | 43.84 | 56.16 | 43.54 | 56.46 | $sp^{99.99}d^{0.87}/sp^{99.99}d^{1.35}$  | $sp^{99.99}d^{0.42}/sp^{99.99}d^{0.56}$  |
| 3-DCM                | 1 | 1.981 | 1.981 | 40.57 | 59.43 | 40.42 | 59.58 | $sp^{2.07}d^{0.00}/sp^{1.43}d^{0.00}$    | $sp^{2.11}d^{0.00}/sp^{1.42}d^{0.00}$    |
|                      | 2 | 1.918 | 1.919 | 43.99 | 56.01 | 43.68 | 56.32 | $sp^{99.99}d^{0.85}/sp^{99.99}d^{1.34}$  | $sp^{99.99}d^{0.43}/sp^{99.99}d^{0.58}$  |
| 3-THF                | 1 | 1.981 | 1.981 | 40.57 | 59.43 | 40.42 | 59.58 | $sp^{2.07}d^{0.00}/sp^{1.43}d^{0.00}$    | $sp^{2.11}d^{0.00}/sp^{1.42}d^{0.00}$    |
|                      | 2 | 1.918 | 1.920 | 44.02 | 55.98 | 43.71 | 56.29 | $sp^{99.99}d^{0.84}/sp^{99.99}d^{1.33}$  | $sp^{99.99}d^{0.43}/sp^{99.99}d^{0.58}$  |
| 3-Hexane             | 1 | 1.982 | 1.981 | 40.61 | 59.39 | 40.47 | 59.53 | $sp^{2.07}d^{0.00}/sp^{1.43}d^{0.00}$    | $sp^{2.10}d^{0.00}/sp^{1.43}d^{0.00}$    |
|                      | 2 | 1.918 | 1.918 | 44.38 | 55.62 | 44.06 | 55.94 | $sp^{99.99}d^{0.77}/sp^{99.99}d^{1.30}$  | $sp^{99.99}d^{0.44}/sp^{99.99}d^{0.63}$  |
| 4-MeOH               | 1 | 1.980 | 1.980 | 40.44 | 59.56 | 40.44 | 59.56 | $sp^{2.12}d^{0.00}/sp^{1.43}d^{0.00}$    | $sp^{2.10}d^{0.00}/sp^{1.43}d^{0.00}$    |
|                      | 2 | 1.908 | 1.908 | 43.77 | 56.23 | 43.77 | 56.23 | $sp^{31.99}d^{2.12}/sp^{41.13}d^{0.00}$  | $sp^{99.99}d^{1.22}/sp^{99.99}d^{0.76}$  |
| 4-CH <sub>3</sub> CN | 1 | 1.980 | 1.980 | 40.44 | 59.56 | 40.44 | 59.56 | $sp^{2.12}d^{0.00}/sp^{1.43}d^{0.00}$    | $sp^{2.12}d^{0.00}/sp^{1.43}d^{0.00}$    |
|                      | 2 | 1.908 | 1.908 | 43.76 | 56.24 | 43.76 | 56.24 | $sp^{99.99}d^{1.12}/sp^{99.99}d^{0.76}$  | $sp^{99.99}d^{1.22}/sp^{99.99}d^{0.76}$  |
| 4-DMSO               | 1 | 1.980 | 1.980 | 40.44 | 59.56 | 40.44 | 59.56 | $sp^{2.12}d^{0.00}/sp^{1.43}d^{0.00}$    | $sp^{2.12}d^{0.00}/sp^{1.43}d^{0.00}$    |
|                      | 2 | 1.908 | 1.908 | 43.76 | 56.24 | 43.76 | 56.24 | $sp^{99.99}d^{1.22}/sp^{99.99}d^{0.76}$  | $sp^{99.99}d^{1.22}/sp^{99.99}d^{0.76}$  |
| 4-DCM                | 1 | 1.980 | 1.980 | 40.44 | 59.56 | 40.44 | 59.56 | $sp^{2.12}d^{0.00}/sp^{1.43}d^{0.00}$    | $sp^{2.12}d^{0.00}/sp^{1.43}d^{0.00}$    |
|                      | 2 | 1.907 | 1.907 | 43.82 | 56.18 | 43.82 | 56.18 | $sp^{99.99}d^{1.21}/sp^{99.99}d^{0.76}$  | $sp^{99.99}d^{1.21}/sp^{99.99}d^{0.76}$  |
| 4-THF                | 1 | 1.980 | 1.980 | 40.44 | 59.56 | 40.44 | 59.56 | $sp^{2.12}d^{0.00}/sp^{1.43}d^{0.00}$    | $sp^{2.12}d^{0.00}/sp^{1.43}d^{0.00}$    |
|                      | 2 | 1.907 | 1.907 | 43.84 | 56.16 | 43.84 | 56.16 | $sp^{99.99}d^{1.20}/sp^{99.99}d^{0.76}$  | $sp^{99.99}d^{1.20}/sp^{99.99}d^{0.76}$  |
| 4-Hexane             | 1 | 1.980 | 1.980 | 40.46 | 59.54 | 40.46 | 59.54 | $sp^{2.13}d^{0.00}/sp^{1.43}d^{0.00}$    | $sp^{2.13}d^{0.00}/sp^{1.43}d^{0.00}$    |
|                      | 2 | 1.907 | 1.907 | 44.00 | 56.00 | 44.00 | 56.00 | $sp^{99.99}d^{1.16}/sp^{99.99}d^{0.77}$  | $sp^{99.99}d^{1.16}/sp^{99.99}d^{0.77}$  |

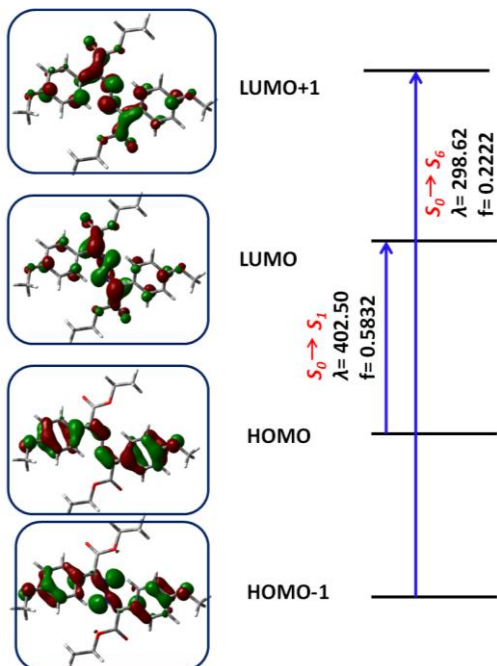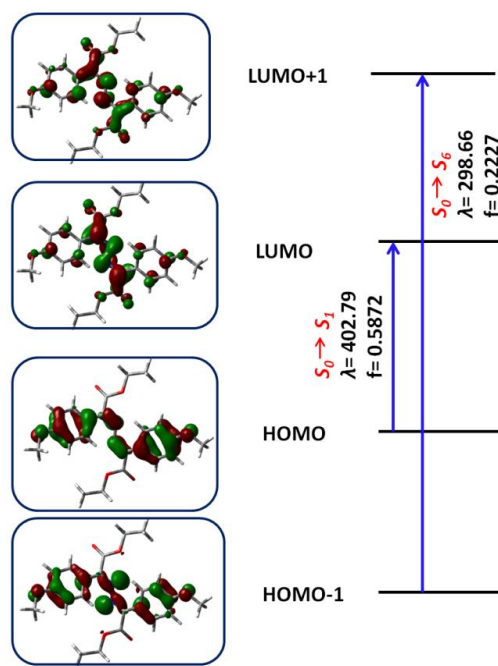

### 1-Methanol

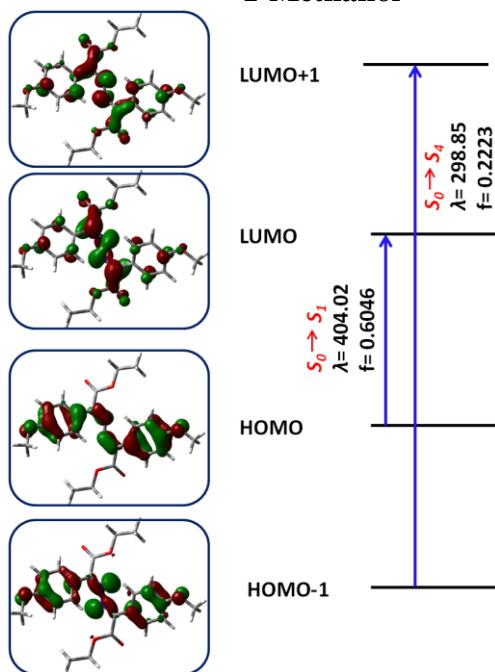

### 1-DCM

### 1-Acetonitrile

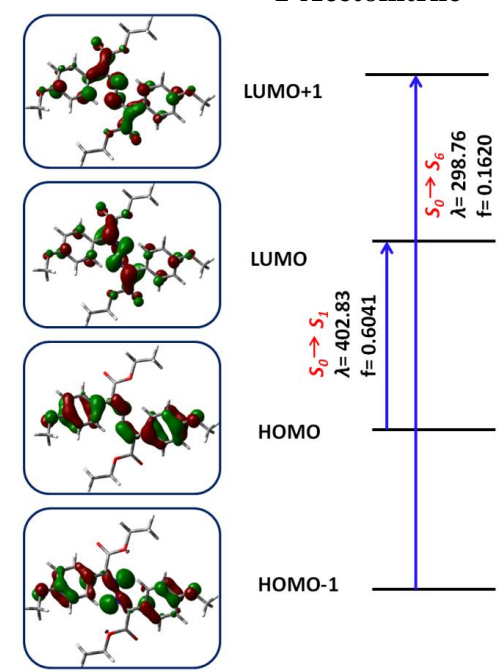

### 1-DMSO

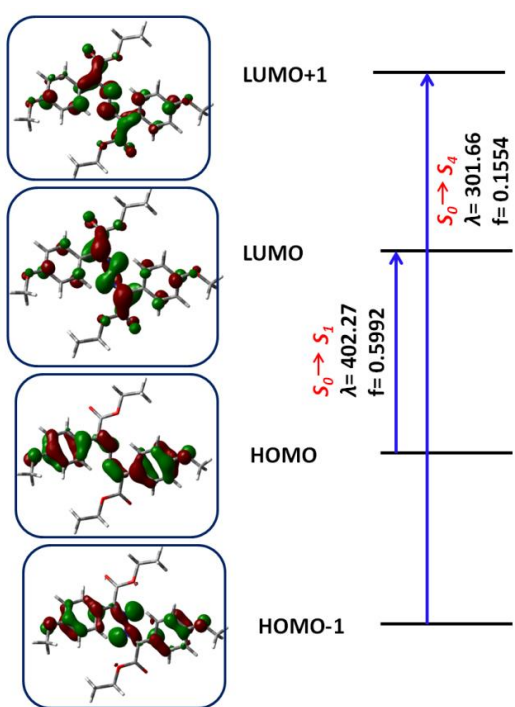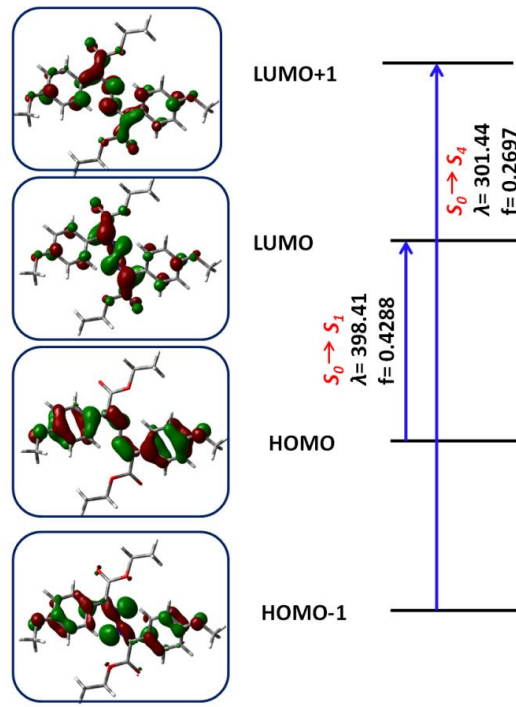

1-THF

1-Hexane

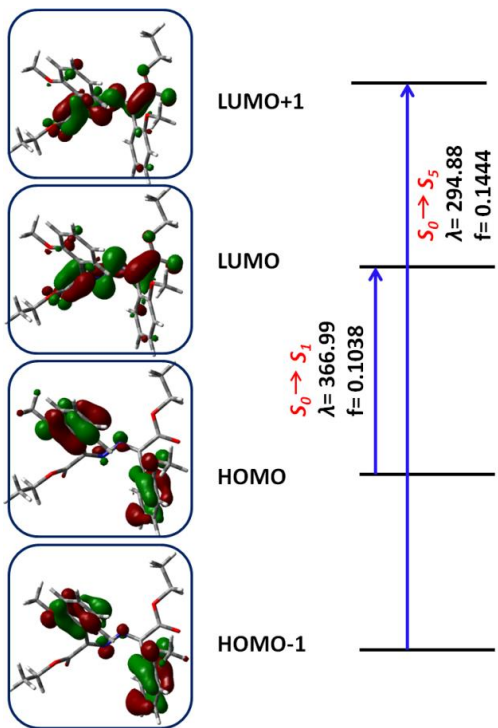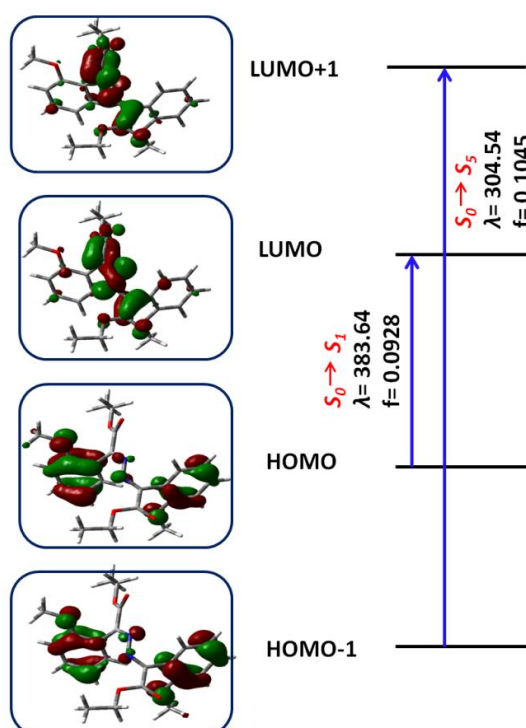

2-Methanol

2-Acetonitrile

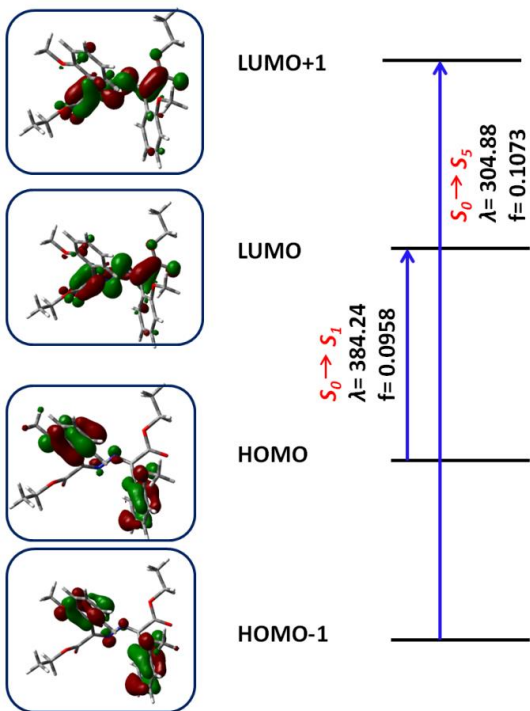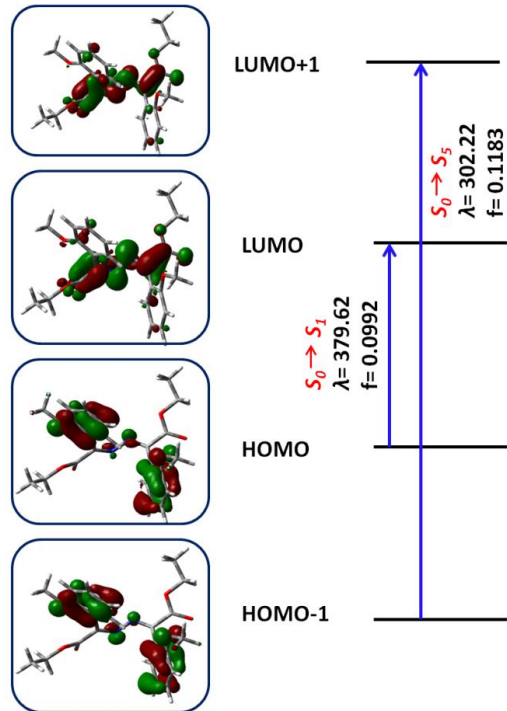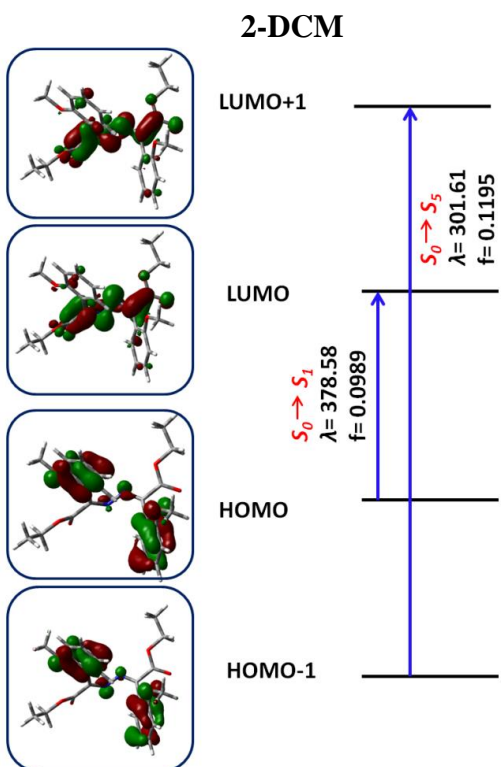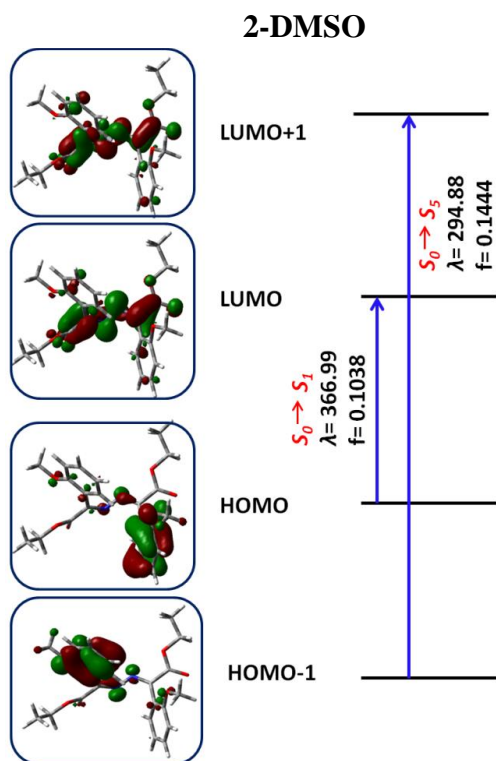

**2-THF**

**2 Hexane**

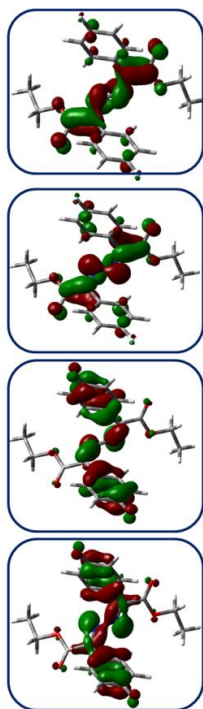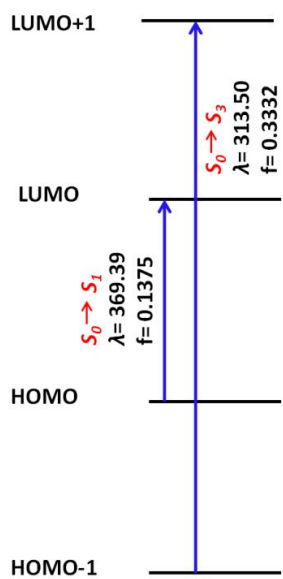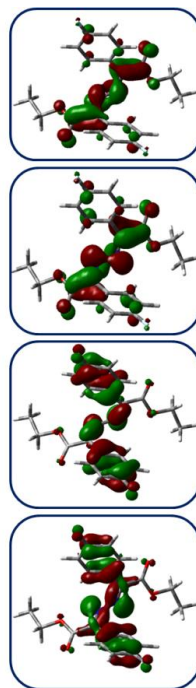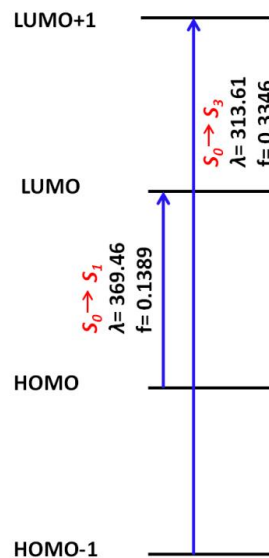

### 3-Methanol

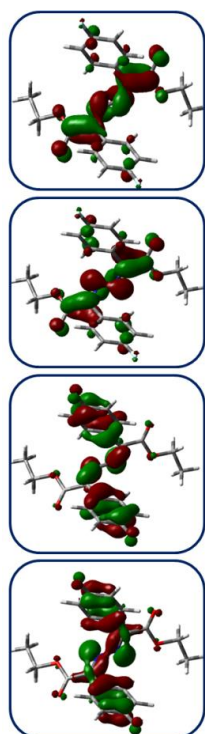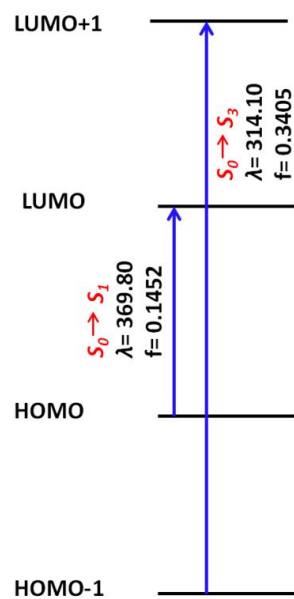

### 3-DMSO

### 3-Acetonitrile

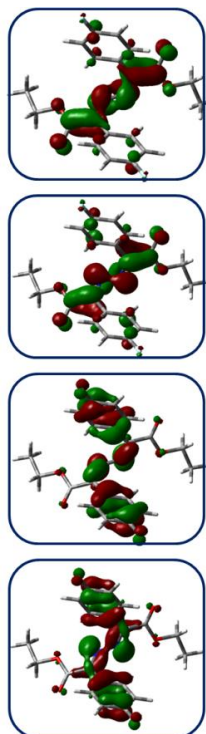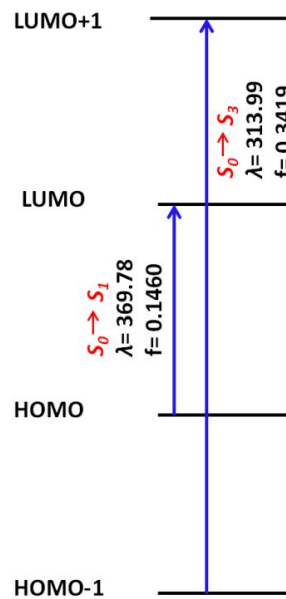

### 3-DCM

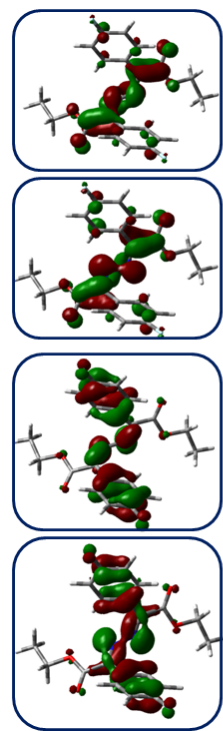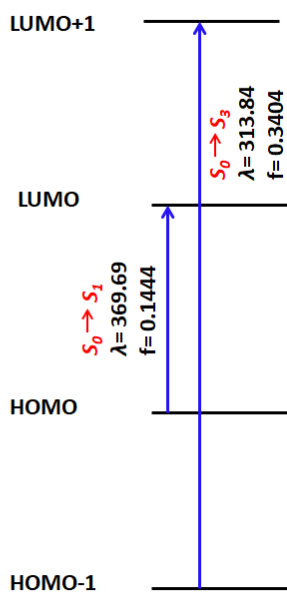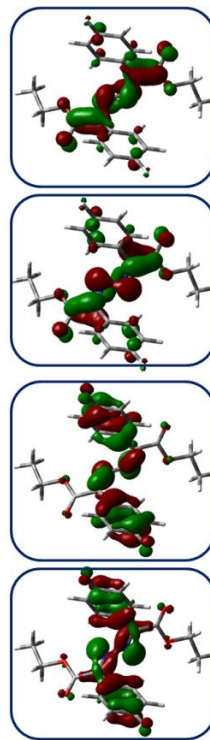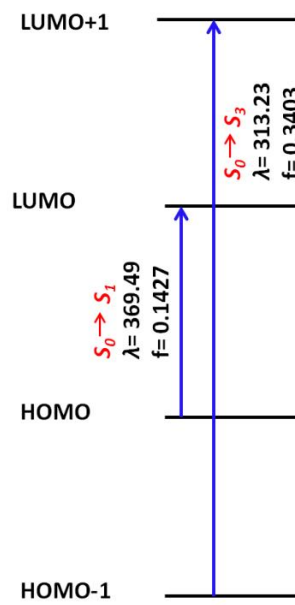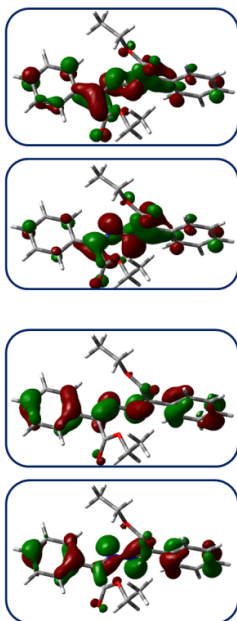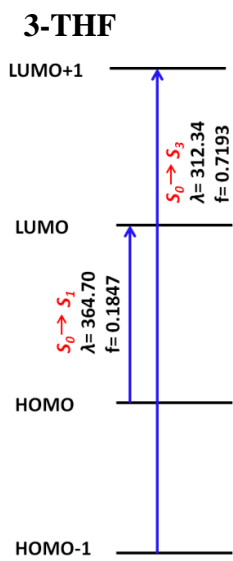

4-Methanol

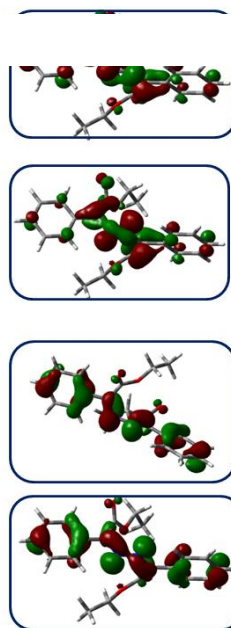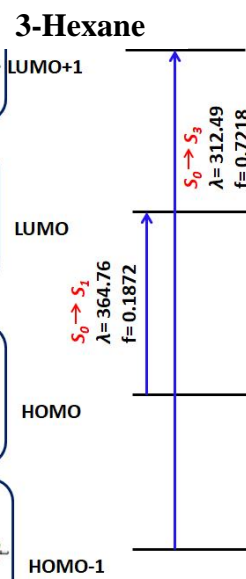

4-CH<sub>3</sub>CN

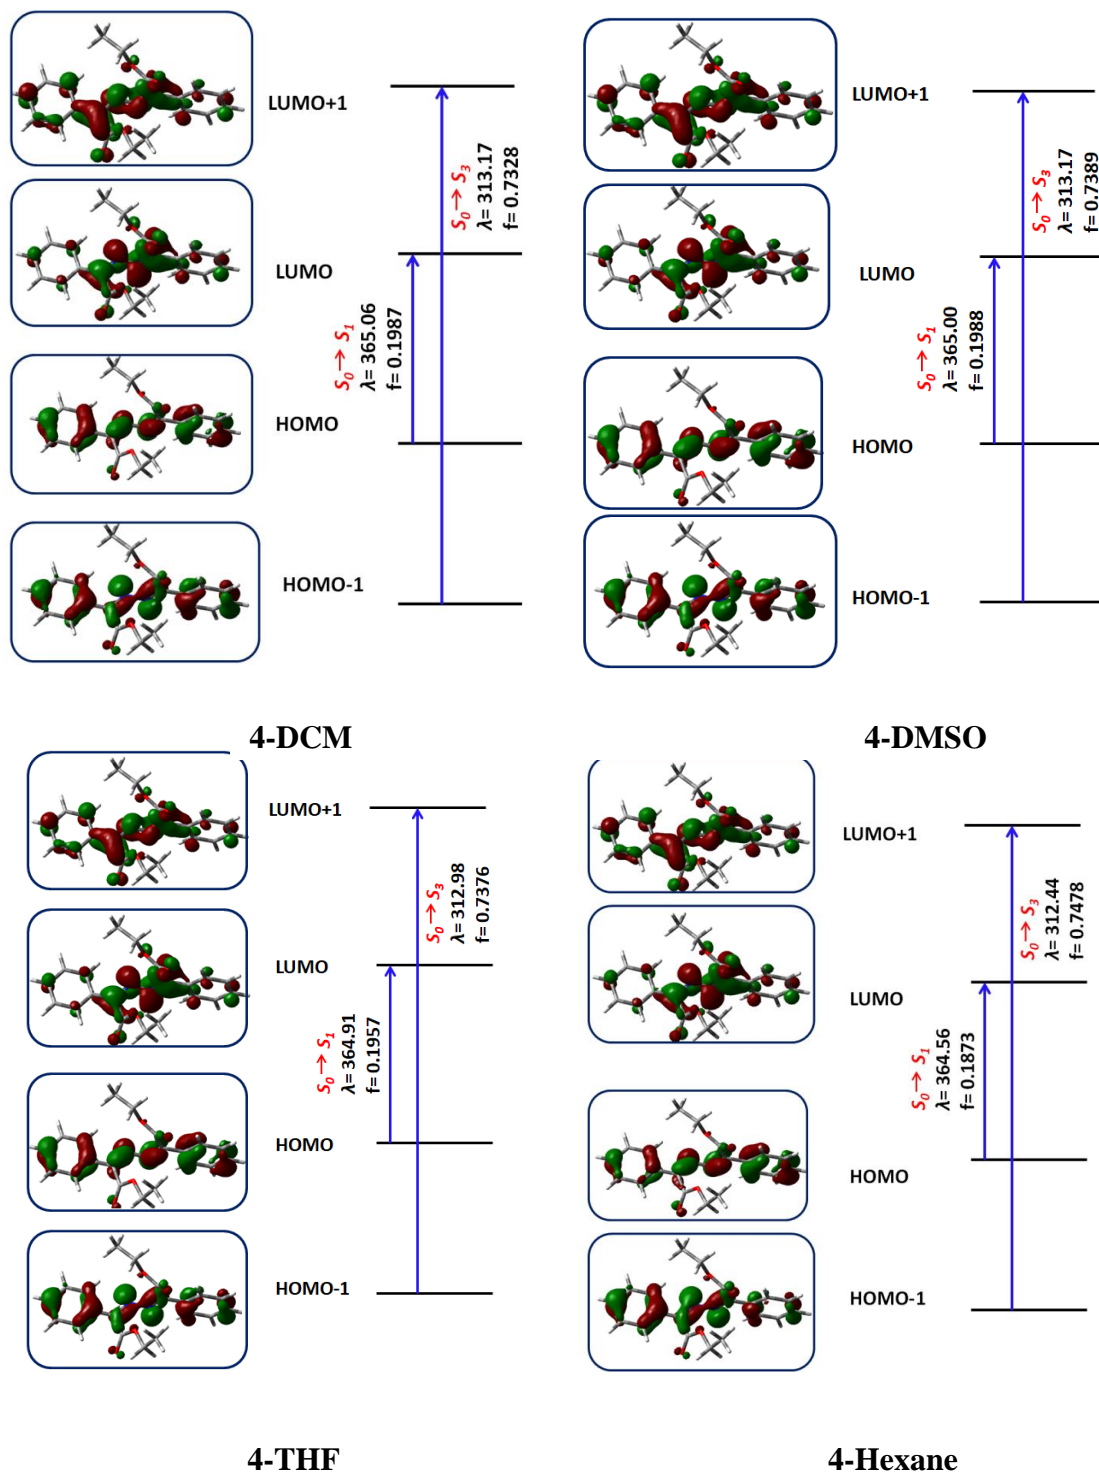

Fig. S6. Possible transitions from TD-DFT calculation for the compounds in different solvent system.

**Table S2.** Cartesian coordinates of all the systems.

**1-CH3OH**

0 1

|   |             |             |             |
|---|-------------|-------------|-------------|
| C | 1.40997837  | 1.20390454  | 0.00000000  |
| C | 0.14252337  | 0.80057054  | 0.63866300  |
| C | -0.01871863 | -0.47121346 | 1.22356600  |
| C | -0.96216063 | 1.68596854  | 0.69817000  |
| C | -1.21566463 | -0.85385546 | 1.82623400  |
| H | 0.79447437  | -1.18219746 | 1.21272200  |
| C | -2.15382263 | 1.31065954  | 1.29336300  |
| H | -0.88301463 | 2.66617354  | 0.24723500  |
| C | -2.29544163 | 0.03613054  | 1.86526100  |
| H | -1.28824563 | -1.84218246 | 2.26548000  |
| H | -2.99959863 | 1.99033054  | 1.32567000  |
| N | 2.40224037  | 0.45762754  | -0.38798700 |
| N | 2.27997437  | -0.87796646 | -0.43325700 |
| C | 3.26785637  | -1.65116146 | -0.08939100 |
| C | 4.53125537  | -1.29744046 | 0.58707200  |
| C | 5.61717837  | -2.19671546 | 0.61802900  |
| C | 4.70302837  | -0.05365146 | 1.24152000  |
| C | 6.81524337  | -1.87842046 | 1.25155500  |
| H | 5.53193137  | -3.15072046 | 0.11501400  |
| C | 5.89218937  | 0.26753254  | 1.87553900  |
| H | 3.90275137  | 0.67177654  | 1.25147000  |
| C | 6.96260337  | -0.63915246 | 1.88817200  |
| H | 7.62410537  | -2.60006346 | 1.23745000  |
| H | 6.01428037  | 1.22158454  | 2.37857400  |

|   |             |             |             |
|---|-------------|-------------|-------------|
| C | 2.99908437  | -3.09322346 | -0.47053500 |
| O | 3.80279537  | -3.84433646 | -0.98862900 |
| C | 1.67655237  | 2.66980154  | -0.27810300 |
| O | 0.87598337  | 3.44893554  | -0.75783800 |
| C | 3.31238637  | 4.37849154  | -0.22971300 |
| H | 3.21876637  | 4.53995954  | -1.30836600 |
| O | 2.92874237  | 3.01513554  | 0.06763700  |
| C | 4.73851637  | 4.56236154  | 0.25401000  |
| H | 4.80890837  | 4.40318754  | 1.33505400  |
| H | 5.41243137  | 3.85778554  | -0.24320500 |
| H | 5.07632537  | 5.58094054  | 0.03353600  |
| O | 1.73882937  | -3.45456546 | -0.17088400 |
| C | 1.35356637  | -4.78938246 | -0.57377900 |
| H | 1.46509137  | -4.87291346 | -1.65953400 |
| C | -0.08227163 | -4.99783846 | -0.12999100 |
| H | -0.17015763 | -4.91834046 | 0.95870300  |
| H | -0.74212363 | -4.25295646 | -0.58567100 |
| H | -0.42303763 | -5.99469146 | -0.43066200 |
| C | 9.19466437  | -1.11052346 | 2.59636700  |
| H | 8.93964237  | -2.04644946 | 3.11006100  |
| H | 9.57682837  | -1.34132646 | 1.59362700  |
| H | 9.96440537  | -0.58474446 | 3.16398200  |
| C | -3.70571263 | -1.50746846 | 3.01925900  |
| H | -4.72898263 | -1.50212846 | 3.39874400  |
| H | -3.59535763 | -2.31341646 | 2.28219600  |
| H | -3.01058963 | -1.68098646 | 3.85098600  |
| O | -3.50325963 | -0.23185846 | 2.42956900  |
| O | 8.08312637  | -0.22840646 | 2.53991800  |

|   |            |             |             |
|---|------------|-------------|-------------|
| H | 2.03832837 | -5.50904746 | -0.11361200 |
| H | 2.61391637 | 5.05778754  | 0.26948200  |

**1- CH3CN**

0 1

|   |             |             |             |
|---|-------------|-------------|-------------|
| C | -0.73752715 | 0.11930586  | 0.00000000  |
| C | -2.00498215 | -0.28402814 | 0.63866300  |
| C | -2.16622415 | -1.55581214 | 1.22356600  |
| C | -3.10966615 | 0.60136986  | 0.69817000  |
| C | -3.36317015 | -1.93845414 | 1.82623400  |
| H | -1.35303115 | -2.26679614 | 1.21272200  |
| C | -4.30132815 | 0.22606086  | 1.29336300  |
| H | -3.03052015 | 1.58157486  | 0.24723500  |
| C | -4.44294715 | -1.04846814 | 1.86526100  |
| H | -3.43575115 | -2.92678114 | 2.26548000  |
| H | -5.14710415 | 0.90573186  | 1.32567000  |
| N | 0.25473485  | -0.62697114 | -0.38798700 |
| N | 0.13246885  | -1.96256514 | -0.43325700 |
| C | 1.12035085  | -2.73576014 | -0.08939100 |
| C | 2.38374985  | -2.38203914 | 0.58707200  |
| C | 3.46967285  | -3.28131414 | 0.61802900  |
| C | 2.55552285  | -1.13825014 | 1.24152000  |
| C | 4.66773785  | -2.96301914 | 1.25155500  |
| H | 3.38442585  | -4.23531914 | 0.11501400  |
| C | 3.74468385  | -0.81706614 | 1.87553900  |
| H | 1.75524585  | -0.41282214 | 1.25147000  |
| C | 4.81509785  | -1.72375114 | 1.88817200  |
| H | 5.47659985  | -3.68466214 | 1.23745000  |
| H | 3.86677485  | 0.13698586  | 2.37857400  |

|   |             |             |             |
|---|-------------|-------------|-------------|
| C | 0.85157885  | -4.17782214 | -0.47053500 |
| O | 1.65528985  | -4.92893514 | -0.98862900 |
| C | -0.47095315 | 1.58520286  | -0.27810300 |
| O | -1.27152215 | 2.36433686  | -0.75783800 |
| C | 1.16488085  | 3.29389286  | -0.22971300 |
| H | 1.07126085  | 3.45536086  | -1.30836600 |
| O | 0.78123685  | 1.93053686  | 0.06763700  |
| C | 2.59101085  | 3.47776286  | 0.25401000  |
| H | 2.66140285  | 3.31858886  | 1.33505400  |
| H | 3.26492585  | 2.77318686  | -0.24320500 |
| H | 2.92881985  | 4.49634186  | 0.03353600  |
| O | -0.40867615 | -4.53916414 | -0.17088400 |
| C | -0.79393915 | -5.87398114 | -0.57377900 |
| H | -0.68241415 | -5.95751214 | -1.65953400 |
| C | -2.22977715 | -6.08243714 | -0.12999100 |
| H | -2.31766315 | -6.00293914 | 0.95870300  |
| H | -2.88962915 | -5.33755514 | -0.58567100 |
| H | -2.57054315 | -7.07929014 | -0.43066200 |
| C | 7.04715885  | -2.19512214 | 2.59636700  |
| H | 6.79213685  | -3.13104814 | 3.11006100  |
| H | 7.42932285  | -2.42592514 | 1.59362700  |
| H | 7.81689985  | -1.66934314 | 3.16398200  |
| C | -5.85321815 | -2.59206714 | 3.01925900  |
| H | -6.87648815 | -2.58672714 | 3.39874400  |
| H | -5.74286315 | -3.39801514 | 2.28219600  |
| H | -5.15809515 | -2.76558514 | 3.85098600  |
| O | -5.65076515 | -1.31645714 | 2.42956900  |
| O | 5.93562085  | -1.31300514 | 2.53991800  |

|   |             |             |             |
|---|-------------|-------------|-------------|
| H | -0.10917715 | -6.59364614 | -0.11361200 |
| H | 0.46641085  | 3.97318886  | 0.26948200  |

### 1-DMSO

0 1

|   |             |             |             |
|---|-------------|-------------|-------------|
| C | -0.95893600 | 1.53809500  | -0.73178900 |
| C | -2.22639100 | 1.13476100  | -0.09312600 |
| C | -2.38763300 | -0.13702300 | 0.49177700  |
| C | -3.33107500 | 2.02015900  | -0.03361900 |
| C | -3.58457900 | -0.51966500 | 1.09444500  |
| H | -1.57444000 | -0.84800700 | 0.48093300  |
| C | -4.52273700 | 1.64485000  | 0.56157400  |
| H | -3.25192900 | 3.00036400  | -0.48455400 |
| C | -4.66435600 | 0.37032100  | 1.13347200  |
| H | -3.65716000 | -1.50799200 | 1.53369100  |
| H | -5.36851300 | 2.32452100  | 0.59388100  |
| N | 0.03332600  | 0.79181800  | -1.11977600 |
| N | -0.08894000 | -0.54377600 | -1.16504600 |
| C | 0.89894200  | -1.31697100 | -0.82118000 |
| C | 2.16234100  | -0.96325000 | -0.14471700 |
| C | 3.24826400  | -1.86252500 | -0.11376000 |
| C | 2.33411400  | 0.28053900  | 0.50973100  |
| C | 4.44632900  | -1.54423000 | 0.51976600  |
| H | 3.16301700  | -2.81653000 | -0.61677500 |
| C | 3.52327500  | 0.60172300  | 1.14375000  |
| H | 1.53383700  | 1.00596700  | 0.51968100  |
| C | 4.59368900  | -0.30496200 | 1.15638300  |
| H | 5.25519100  | -2.26587300 | 0.50566100  |
| H | 3.64536600  | 1.55577500  | 1.64678500  |

|   |             |             |             |
|---|-------------|-------------|-------------|
| C | 0.63017000  | -2.75903300 | -1.20232400 |
| O | 1.43388100  | -3.51014600 | -1.72041800 |
| C | -0.69236200 | 3.00399200  | -1.00989200 |
| O | -1.49293100 | 3.78312600  | -1.48962700 |
| C | 0.94347200  | 4.71268200  | -0.96150200 |
| H | 0.84985200  | 4.87415000  | -2.04015500 |
| O | 0.55982800  | 3.34932600  | -0.66415200 |
| C | 2.36960200  | 4.89655200  | -0.47777900 |
| H | 2.43999400  | 4.73737800  | 0.60326500  |
| H | 3.04351700  | 4.19197600  | -0.97499400 |
| H | 2.70741100  | 5.91513100  | -0.69825300 |
| O | -0.63008500 | -3.12037500 | -0.90267300 |
| C | -1.01534800 | -4.45519200 | -1.30556800 |
| H | -0.90382300 | -4.53872300 | -2.39132300 |
| C | -2.45118600 | -4.66364800 | -0.86178000 |
| H | -2.53907200 | -4.58415000 | 0.22691400  |
| H | -3.11103800 | -3.91876600 | -1.31746000 |
| H | -2.79195200 | -5.66050100 | -1.16245100 |
| C | 6.82575000  | -0.77633300 | 1.86457800  |
| H | 6.57072800  | -1.71225900 | 2.37827200  |
| H | 7.20791400  | -1.00713600 | 0.86183800  |
| H | 7.59549100  | -0.25055400 | 2.43219300  |
| C | -6.07462700 | -1.17327800 | 2.28747000  |
| H | -7.09789700 | -1.16793800 | 2.66695500  |
| H | -5.96427200 | -1.97922600 | 1.55040700  |
| H | -5.37950400 | -1.34679600 | 3.11919700  |
| O | -5.87217400 | 0.10233200  | 1.69778000  |
| O | 5.71421200  | 0.10578400  | 1.80812900  |

|   |             |             |             |
|---|-------------|-------------|-------------|
| H | -0.33058600 | -5.17485700 | -0.84540100 |
| H | 0.24500200  | 5.39197800  | -0.46230700 |

**1-DCM**

0 1

|   |             |             |             |
|---|-------------|-------------|-------------|
| C | -0.95893600 | 1.53809500  | -0.73178900 |
| C | -2.22639100 | 1.13476100  | -0.09312600 |
| C | -2.38763300 | -0.13702300 | 0.49177700  |
| C | -3.33107500 | 2.02015900  | -0.03361900 |
| C | -3.58457900 | -0.51966500 | 1.09444500  |
| H | -1.57444000 | -0.84800700 | 0.48093300  |
| C | -4.52273700 | 1.64485000  | 0.56157400  |
| H | -3.25192900 | 3.00036400  | -0.48455400 |
| C | -4.66435600 | 0.37032100  | 1.13347200  |
| H | -3.65716000 | -1.50799200 | 1.53369100  |
| H | -5.36851300 | 2.32452100  | 0.59388100  |
| N | 0.03332600  | 0.79181800  | -1.11977600 |
| N | -0.08894000 | -0.54377600 | -1.16504600 |
| C | 0.89894200  | -1.31697100 | -0.82118000 |
| C | 2.16234100  | -0.96325000 | -0.14471700 |
| C | 3.24826400  | -1.86252500 | -0.11376000 |
| C | 2.33411400  | 0.28053900  | 0.50973100  |
| C | 4.44632900  | -1.54423000 | 0.51976600  |
| H | 3.16301700  | -2.81653000 | -0.61677500 |
| C | 3.52327500  | 0.60172300  | 1.14375000  |
| H | 1.53383700  | 1.00596700  | 0.51968100  |
| C | 4.59368900  | -0.30496200 | 1.15638300  |
| H | 5.25519100  | -2.26587300 | 0.50566100  |
| H | 3.64536600  | 1.55577500  | 1.64678500  |

|   |             |             |             |
|---|-------------|-------------|-------------|
| C | 0.63017000  | -2.75903300 | -1.20232400 |
| O | 1.43388100  | -3.51014600 | -1.72041800 |
| C | -0.69236200 | 3.00399200  | -1.00989200 |
| O | -1.49293100 | 3.78312600  | -1.48962700 |
| C | 0.94347200  | 4.71268200  | -0.96150200 |
| H | 0.84985200  | 4.87415000  | -2.04015500 |
| O | 0.55982800  | 3.34932600  | -0.66415200 |
| C | 2.36960200  | 4.89655200  | -0.47777900 |
| H | 2.43999400  | 4.73737800  | 0.60326500  |
| H | 3.04351700  | 4.19197600  | -0.97499400 |
| H | 2.70741100  | 5.91513100  | -0.69825300 |
| O | -0.63008500 | -3.12037500 | -0.90267300 |
| C | -1.01534800 | -4.45519200 | -1.30556800 |
| H | -0.90382300 | -4.53872300 | -2.39132300 |
| C | -2.45118600 | -4.66364800 | -0.86178000 |
| H | -2.53907200 | -4.58415000 | 0.22691400  |
| H | -3.11103800 | -3.91876600 | -1.31746000 |
| H | -2.79195200 | -5.66050100 | -1.16245100 |
| C | 6.82575000  | -0.77633300 | 1.86457800  |
| H | 6.57072800  | -1.71225900 | 2.37827200  |
| H | 7.20791400  | -1.00713600 | 0.86183800  |
| H | 7.59549100  | -0.25055400 | 2.43219300  |
| C | -6.07462700 | -1.17327800 | 2.28747000  |
| H | -7.09789700 | -1.16793800 | 2.66695500  |
| H | -5.96427200 | -1.97922600 | 1.55040700  |
| H | -5.37950400 | -1.34679600 | 3.11919700  |
| O | -5.87217400 | 0.10233200  | 1.69778000  |
| O | 5.71421200  | 0.10578400  | 1.80812900  |

|   |             |             |             |
|---|-------------|-------------|-------------|
| H | -0.33058600 | -5.17485700 | -0.84540100 |
| H | 0.24500200  | 5.39197800  | -0.46230700 |

**1-THF**

0 1

|   |             |             |             |
|---|-------------|-------------|-------------|
| C | -0.95893600 | 1.53809500  | -0.73178900 |
| C | -2.22639100 | 1.13476100  | -0.09312600 |
| C | -2.38763300 | -0.13702300 | 0.49177700  |
| C | -3.33107500 | 2.02015900  | -0.03361900 |
| C | -3.58457900 | -0.51966500 | 1.09444500  |
| H | -1.57444000 | -0.84800700 | 0.48093300  |
| C | -4.52273700 | 1.64485000  | 0.56157400  |
| H | -3.25192900 | 3.00036400  | -0.48455400 |
| C | -4.66435600 | 0.37032100  | 1.13347200  |
| H | -3.65716000 | -1.50799200 | 1.53369100  |
| H | -5.36851300 | 2.32452100  | 0.59388100  |
| N | 0.03332600  | 0.79181800  | -1.11977600 |
| N | -0.08894000 | -0.54377600 | -1.16504600 |
| C | 0.89894200  | -1.31697100 | -0.82118000 |
| C | 2.16234100  | -0.96325000 | -0.14471700 |
| C | 3.24826400  | -1.86252500 | -0.11376000 |
| C | 2.33411400  | 0.28053900  | 0.50973100  |
| C | 4.44632900  | -1.54423000 | 0.51976600  |
| H | 3.16301700  | -2.81653000 | -0.61677500 |
| C | 3.52327500  | 0.60172300  | 1.14375000  |
| H | 1.53383700  | 1.00596700  | 0.51968100  |
| C | 4.59368900  | -0.30496200 | 1.15638300  |
| H | 5.25519100  | -2.26587300 | 0.50566100  |
| H | 3.64536600  | 1.55577500  | 1.64678500  |

|   |             |             |             |
|---|-------------|-------------|-------------|
| C | 0.63017000  | -2.75903300 | -1.20232400 |
| O | 1.43388100  | -3.51014600 | -1.72041800 |
| C | -0.69236200 | 3.00399200  | -1.00989200 |
| O | -1.49293100 | 3.78312600  | -1.48962700 |
| C | 0.94347200  | 4.71268200  | -0.96150200 |
| H | 0.84985200  | 4.87415000  | -2.04015500 |
| O | 0.55982800  | 3.34932600  | -0.66415200 |
| C | 2.36960200  | 4.89655200  | -0.47777900 |
| H | 2.43999400  | 4.73737800  | 0.60326500  |
| H | 3.04351700  | 4.19197600  | -0.97499400 |
| H | 2.70741100  | 5.91513100  | -0.69825300 |
| O | -0.63008500 | -3.12037500 | -0.90267300 |
| C | -1.01534800 | -4.45519200 | -1.30556800 |
| H | -0.90382300 | -4.53872300 | -2.39132300 |
| C | -2.45118600 | -4.66364800 | -0.86178000 |
| H | -2.53907200 | -4.58415000 | 0.22691400  |
| H | -3.11103800 | -3.91876600 | -1.31746000 |
| H | -2.79195200 | -5.66050100 | -1.16245100 |
| C | 6.82575000  | -0.77633300 | 1.86457800  |
| H | 6.57072800  | -1.71225900 | 2.37827200  |
| H | 7.20791400  | -1.00713600 | 0.86183800  |
| H | 7.59549100  | -0.25055400 | 2.43219300  |
| C | -6.07462700 | -1.17327800 | 2.28747000  |
| H | -7.09789700 | -1.16793800 | 2.66695500  |
| H | -5.96427200 | -1.97922600 | 1.55040700  |
| H | -5.37950400 | -1.34679600 | 3.11919700  |
| O | -5.87217400 | 0.10233200  | 1.69778000  |
| O | 5.71421200  | 0.10578400  | 1.80812900  |

|   |             |             |             |
|---|-------------|-------------|-------------|
| H | -0.33058600 | -5.17485700 | -0.84540100 |
| H | 0.24500200  | 5.39197800  | -0.46230700 |

### 1-Hexane

0 1

|   |             |             |             |
|---|-------------|-------------|-------------|
| C | -0.95893600 | 1.53809500  | -0.73178900 |
| C | -2.22639100 | 1.13476100  | -0.09312600 |
| C | -2.38763300 | -0.13702300 | 0.49177700  |
| C | -3.33107500 | 2.02015900  | -0.03361900 |
| C | -3.58457900 | -0.51966500 | 1.09444500  |
| H | -1.57444000 | -0.84800700 | 0.48093300  |
| C | -4.52273700 | 1.64485000  | 0.56157400  |
| H | -3.25192900 | 3.00036400  | -0.48455400 |
| C | -4.66435600 | 0.37032100  | 1.13347200  |
| H | -3.65716000 | -1.50799200 | 1.53369100  |
| H | -5.36851300 | 2.32452100  | 0.59388100  |
| N | 0.03332600  | 0.79181800  | -1.11977600 |
| N | -0.08894000 | -0.54377600 | -1.16504600 |
| C | 0.89894200  | -1.31697100 | -0.82118000 |
| C | 2.16234100  | -0.96325000 | -0.14471700 |
| C | 3.24826400  | -1.86252500 | -0.11376000 |
| C | 2.33411400  | 0.28053900  | 0.50973100  |
| C | 4.44632900  | -1.54423000 | 0.51976600  |
| H | 3.16301700  | -2.81653000 | -0.61677500 |
| C | 3.52327500  | 0.60172300  | 1.14375000  |
| H | 1.53383700  | 1.00596700  | 0.51968100  |
| C | 4.59368900  | -0.30496200 | 1.15638300  |
| H | 5.25519100  | -2.26587300 | 0.50566100  |
| H | 3.64536600  | 1.55577500  | 1.64678500  |

|   |             |             |             |
|---|-------------|-------------|-------------|
| C | 0.63017000  | -2.75903300 | -1.20232400 |
| O | 1.43388100  | -3.51014600 | -1.72041800 |
| C | -0.69236200 | 3.00399200  | -1.00989200 |
| O | -1.49293100 | 3.78312600  | -1.48962700 |
| C | 0.94347200  | 4.71268200  | -0.96150200 |
| H | 0.84985200  | 4.87415000  | -2.04015500 |
| O | 0.55982800  | 3.34932600  | -0.66415200 |
| C | 2.36960200  | 4.89655200  | -0.47777900 |
| H | 2.43999400  | 4.73737800  | 0.60326500  |
| H | 3.04351700  | 4.19197600  | -0.97499400 |
| H | 2.70741100  | 5.91513100  | -0.69825300 |
| O | -0.63008500 | -3.12037500 | -0.90267300 |
| C | -1.01534800 | -4.45519200 | -1.30556800 |
| H | -0.90382300 | -4.53872300 | -2.39132300 |
| C | -2.45118600 | -4.66364800 | -0.86178000 |
| H | -2.53907200 | -4.58415000 | 0.22691400  |
| H | -3.11103800 | -3.91876600 | -1.31746000 |
| H | -2.79195200 | -5.66050100 | -1.16245100 |
| C | 6.82575000  | -0.77633300 | 1.86457800  |
| H | 6.57072800  | -1.71225900 | 2.37827200  |
| H | 7.20791400  | -1.00713600 | 0.86183800  |
| H | 7.59549100  | -0.25055400 | 2.43219300  |
| C | -6.07462700 | -1.17327800 | 2.28747000  |
| H | -7.09789700 | -1.16793800 | 2.66695500  |
| H | -5.96427200 | -1.97922600 | 1.55040700  |
| H | -5.37950400 | -1.34679600 | 3.11919700  |
| O | -5.87217400 | 0.10233200  | 1.69778000  |
| O | 5.71421200  | 0.10578400  | 1.80812900  |

|   |             |             |             |
|---|-------------|-------------|-------------|
| H | -0.33058600 | -5.17485700 | -0.84540100 |
| H | 0.24500200  | 5.39197800  | -0.46230700 |

## 2- CH3OH

0 1

|   |             |             |             |
|---|-------------|-------------|-------------|
| C | -2.58134502 | 1.03036875  | 0.00000000  |
| C | -2.26291002 | -0.28487125 | 0.35297700  |
| C | -2.54395102 | -1.32608825 | -0.53476500 |
| C | -3.14564202 | -1.06884025 | -1.76556700 |
| C | -3.45388702 | 0.24578775  | -2.11709900 |
| C | -3.16084802 | 1.30793975  | -1.25532000 |
| H | -1.80995302 | -0.50498325 | 1.31281200  |
| H | -2.29530702 | -2.34520525 | -0.25057500 |
| H | -3.36844502 | -1.88088725 | -2.45093200 |
| H | -3.92057902 | 0.45957075  | -3.07327200 |
| C | -3.42670202 | 2.71351475  | -1.66848100 |
| C | -2.25054502 | 3.65619375  | -1.69959200 |
| C | -1.52962202 | 5.88852575  | -1.93509800 |
| H | -0.91088402 | 5.81314075  | -1.03452000 |
| H | -0.90054502 | 5.61811375  | -2.78972200 |
| C | -2.14498902 | 7.26674975  | -2.09217500 |
| H | -2.77453602 | 7.51312575  | -1.23114600 |
| H | -1.35375902 | 8.02068575  | -2.17058100 |
| H | -2.76262102 | 7.31703575  | -2.99444000 |
| C | -6.68515402 | 2.51878775  | -1.54724200 |
| C | -7.82341702 | 1.64336575  | -2.01853200 |
| O | -1.09886602 | 3.27726675  | -1.62562500 |
| O | -2.61483802 | 4.94168175  | -1.83544100 |
| N | -4.55539302 | 3.18337075  | -2.07318900 |

|   |              |             |             |
|---|--------------|-------------|-------------|
| N | -5.61716002  | 2.39561375  | -2.25560200 |
| C | -9.78885402  | 0.52747375  | -1.32896900 |
| H | -9.42551902  | -0.40893925 | -1.76468500 |
| H | -10.38431202 | 1.03684075  | -2.09425300 |
| C | -10.57632502 | 0.29549175  | -0.05249800 |
| H | -11.45032702 | -0.33098025 | -0.26251700 |
| H | -9.96150902  | -0.21042025 | 0.69888300  |
| H | -10.92402202 | 1.24342075  | 0.37089500  |
| O | -7.95739402  | 1.21909675  | -3.14389600 |
| O | -8.65678602  | 1.35723675  | -0.99569200 |
| C | -6.85310202  | 3.39959375  | -0.36288400 |
| C | -7.93401102  | 4.31154675  | -0.32694800 |
| C | -5.96134402  | 3.36945475  | 0.71372500  |
| C | -8.11137902  | 5.15120375  | 0.77574700  |
| C | -6.13628202  | 4.20673375  | 1.81766700  |
| H | -5.13126102  | 2.67163075  | 0.69705600  |
| C | -7.21096102  | 5.09172975  | 1.84342400  |
| H | -8.93640602  | 5.85336675  | 0.80863200  |
| H | -5.43735102  | 4.16314475  | 2.64740300  |
| H | -7.35767902  | 5.74969375  | 2.69597700  |
| C | -1.62118802  | 1.94724975  | 1.99249300  |
| H | -2.10663002  | 1.28147375  | 2.71831000  |
| H | -0.62453802  | 1.55855975  | 1.75040300  |
| H | -1.52684502  | 2.94385375  | 2.42745900  |
| C | -9.84480302  | 5.19771475  | -1.46716500 |
| H | -10.55485302 | 4.98993775  | -0.65587500 |
| H | -9.52345802  | 6.24558375  | -1.40770800 |
| H | -10.33074002 | 5.02341675  | -2.42858000 |

|   |             |            |             |
|---|-------------|------------|-------------|
| O | -2.40867902 | 2.10730575 | 0.82218700  |
| O | -8.73635702 | 4.31352775 | -1.42864700 |

## 2- CH3CN

0 1

|   |             |             |             |
|---|-------------|-------------|-------------|
| C | -2.64642095 | 0.79175704  | 0.00000000  |
| C | -2.32798595 | -0.52348296 | 0.35297700  |
| C | -2.60902695 | -1.56469996 | -0.53476500 |
| C | -3.21071795 | -1.30745196 | -1.76556700 |
| C | -3.51896295 | 0.00717604  | -2.11709900 |
| C | -3.22592395 | 1.06932804  | -1.25532000 |
| H | -1.87502895 | -0.74359496 | 1.31281200  |
| H | -2.36038295 | -2.58381696 | -0.25057500 |
| H | -3.43352095 | -2.11949896 | -2.45093200 |
| H | -3.98565495 | 0.22095904  | -3.07327200 |
| C | -3.49177795 | 2.47490304  | -1.66848100 |
| C | -2.31562095 | 3.41758204  | -1.69959200 |
| C | -1.59469795 | 5.64991404  | -1.93509800 |
| H | -0.97595995 | 5.57452904  | -1.03452000 |
| H | -0.96562095 | 5.37950204  | -2.78972200 |
| C | -2.21006495 | 7.02813804  | -2.09217500 |
| H | -2.83961195 | 7.27451404  | -1.23114600 |
| H | -1.41883495 | 7.78207404  | -2.17058100 |
| H | -2.82769695 | 7.07842404  | -2.99444000 |
| C | -6.75022995 | 2.28017604  | -1.54724200 |
| C | -7.88849295 | 1.40475404  | -2.01853200 |
| O | -1.16394195 | 3.03865504  | -1.62562500 |
| O | -2.67991395 | 4.70307004  | -1.83544100 |
| N | -4.62046895 | 2.94475904  | -2.07318900 |

|   |              |             |             |
|---|--------------|-------------|-------------|
| N | -5.68223595  | 2.15700204  | -2.25560200 |
| C | -9.85392995  | 0.28886204  | -1.32896900 |
| H | -9.49059495  | -0.64755096 | -1.76468500 |
| H | -10.44938795 | 0.79822904  | -2.09425300 |
| C | -10.64140095 | 0.05688004  | -0.05249800 |
| H | -11.51540295 | -0.56959196 | -0.26251700 |
| H | -10.02658495 | -0.44903196 | 0.69888300  |
| H | -10.98909795 | 1.00480904  | 0.37089500  |
| O | -8.02246995  | 0.98048504  | -3.14389600 |
| O | -8.72186195  | 1.11862504  | -0.99569200 |
| C | -6.91817795  | 3.16098204  | -0.36288400 |
| C | -7.99908695  | 4.07293504  | -0.32694800 |
| C | -6.02641995  | 3.13084304  | 0.71372500  |
| C | -8.17645495  | 4.91259204  | 0.77574700  |
| C | -6.20135795  | 3.96812204  | 1.81766700  |
| H | -5.19633695  | 2.43301904  | 0.69705600  |
| C | -7.27603695  | 4.85311804  | 1.84342400  |
| H | -9.00148195  | 5.61475504  | 0.80863200  |
| H | -5.50242695  | 3.92453304  | 2.64740300  |
| H | -7.42275495  | 5.51108204  | 2.69597700  |
| C | -1.68626395  | 1.70863804  | 1.99249300  |
| H | -2.17170595  | 1.04286204  | 2.71831000  |
| H | -0.68961395  | 1.31994804  | 1.75040300  |
| H | -1.59192095  | 2.70524204  | 2.42745900  |
| C | -9.90987895  | 4.95910304  | -1.46716500 |
| H | -10.61992895 | 4.75132604  | -0.65587500 |
| H | -9.58853395  | 6.00697204  | -1.40770800 |
| H | -10.39581595 | 4.78480504  | -2.42858000 |

|   |             |            |             |
|---|-------------|------------|-------------|
| O | -2.47375495 | 1.86869404 | 0.82218700  |
| O | -8.80143295 | 4.07491604 | -1.42864700 |

## 2-DMSO

0 1

|   |             |             |             |
|---|-------------|-------------|-------------|
| C | 2.68033800  | -1.68128600 | 0.82796900  |
| C | 2.99877300  | -2.99652600 | 1.18094600  |
| C | 2.71773200  | -4.03774300 | 0.29320400  |
| C | 2.11604100  | -3.78049500 | -0.93759800 |
| C | 1.80779600  | -2.46586700 | -1.28913000 |
| C | 2.10083500  | -1.40371500 | -0.42735100 |
| H | 3.45173000  | -3.21663800 | 2.14078100  |
| H | 2.96637600  | -5.05686000 | 0.57739400  |
| H | 1.89323800  | -4.59254200 | -1.62296300 |
| H | 1.34110400  | -2.25208400 | -2.24530300 |
| C | 1.83498100  | 0.00186000  | -0.84051200 |
| C | 3.01113800  | 0.94453900  | -0.87162300 |
| C | 3.73206100  | 3.17687100  | -1.10712900 |
| H | 4.35079900  | 3.10148600  | -0.20655100 |
| H | 4.36113800  | 2.90645900  | -1.96175300 |
| C | 3.11669400  | 4.55509500  | -1.26420600 |
| H | 2.48714700  | 4.80147100  | -0.40317700 |
| H | 3.90792400  | 5.30903100  | -1.34261200 |
| H | 2.49906200  | 4.60538100  | -2.16647100 |
| C | -1.42347100 | -0.19286700 | -0.71927300 |
| C | -2.56173400 | -1.06828900 | -1.19056300 |
| O | 4.16281700  | 0.56561200  | -0.79765600 |
| O | 2.64684500  | 2.23002700  | -1.00747200 |
| N | 0.70629000  | 0.47171600  | -1.24522000 |

|   |             |             |             |
|---|-------------|-------------|-------------|
| N | -0.35547700 | -0.31604100 | -1.42763300 |
| C | -4.52717100 | -2.18418100 | -0.50100000 |
| H | -4.16383600 | -3.12059400 | -0.93671600 |
| H | -5.12262900 | -1.67481400 | -1.26628400 |
| C | -5.31464200 | -2.41616300 | 0.77547100  |
| H | -6.18864400 | -3.04263500 | 0.56545200  |
| H | -4.69982600 | -2.92207500 | 1.52685200  |
| H | -5.66233900 | -1.46823400 | 1.19886400  |
| O | -2.69571100 | -1.49255800 | -2.31592700 |
| O | -3.39510300 | -1.35441800 | -0.16772300 |
| C | -1.59141900 | 0.68793900  | 0.46508500  |
| C | -2.67232800 | 1.59989200  | 0.50102100  |
| C | -0.69966100 | 0.65780000  | 1.54169400  |
| C | -2.84969600 | 2.43954900  | 1.60371600  |
| C | -0.87459900 | 1.49507900  | 2.64563600  |
| H | 0.13042200  | -0.04002400 | 1.52502500  |
| C | -1.94927800 | 2.38007500  | 2.67139300  |
| H | -3.67472300 | 3.14171200  | 1.63660100  |
| H | -0.17566800 | 1.45149000  | 3.47537200  |
| H | -2.09599600 | 3.03803900  | 3.52394600  |
| C | 3.64049500  | -0.76440500 | 2.82046200  |
| H | 3.15505300  | -1.43018100 | 3.54627900  |
| H | 4.63714500  | -1.15309500 | 2.57837200  |
| H | 3.73483800  | 0.23219900  | 3.25542800  |
| C | -4.58312000 | 2.48606000  | -0.63919600 |
| H | -5.29317000 | 2.27828300  | 0.17209400  |
| H | -4.26177500 | 3.53392900  | -0.57973900 |
| H | -5.06905700 | 2.31176200  | -1.60061100 |

|   |             |             |             |
|---|-------------|-------------|-------------|
| O | 2.85300400  | -0.60434900 | 1.65015600  |
| O | -3.47467400 | 1.60187300  | -0.60067800 |

## 2-DCM

0 1

|   |             |             |             |
|---|-------------|-------------|-------------|
| C | 2.68033800  | -1.68128600 | 0.82796900  |
| C | 2.99877300  | -2.99652600 | 1.18094600  |
| C | 2.71773200  | -4.03774300 | 0.29320400  |
| C | 2.11604100  | -3.78049500 | -0.93759800 |
| C | 1.80779600  | -2.46586700 | -1.28913000 |
| C | 2.10083500  | -1.40371500 | -0.42735100 |
| H | 3.45173000  | -3.21663800 | 2.14078100  |
| H | 2.96637600  | -5.05686000 | 0.57739400  |
| H | 1.89323800  | -4.59254200 | -1.62296300 |
| H | 1.34110400  | -2.25208400 | -2.24530300 |
| C | 1.83498100  | 0.00186000  | -0.84051200 |
| C | 3.01113800  | 0.94453900  | -0.87162300 |
| C | 3.73206100  | 3.17687100  | -1.10712900 |
| H | 4.35079900  | 3.10148600  | -0.20655100 |
| H | 4.36113800  | 2.90645900  | -1.96175300 |
| C | 3.11669400  | 4.55509500  | -1.26420600 |
| H | 2.48714700  | 4.80147100  | -0.40317700 |
| H | 3.90792400  | 5.30903100  | -1.34261200 |
| H | 2.49906200  | 4.60538100  | -2.16647100 |
| C | -1.42347100 | -0.19286700 | -0.71927300 |
| C | -2.56173400 | -1.06828900 | -1.19056300 |
| O | 4.16281700  | 0.56561200  | -0.79765600 |
| O | 2.64684500  | 2.23002700  | -1.00747200 |
| N | 0.70629000  | 0.47171600  | -1.24522000 |

|   |             |             |             |
|---|-------------|-------------|-------------|
| N | -0.35547700 | -0.31604100 | -1.42763300 |
| C | -4.52717100 | -2.18418100 | -0.50100000 |
| H | -4.16383600 | -3.12059400 | -0.93671600 |
| H | -5.12262900 | -1.67481400 | -1.26628400 |
| C | -5.31464200 | -2.41616300 | 0.77547100  |
| H | -6.18864400 | -3.04263500 | 0.56545200  |
| H | -4.69982600 | -2.92207500 | 1.52685200  |
| H | -5.66233900 | -1.46823400 | 1.19886400  |
| O | -2.69571100 | -1.49255800 | -2.31592700 |
| O | -3.39510300 | -1.35441800 | -0.16772300 |
| C | -1.59141900 | 0.68793900  | 0.46508500  |
| C | -2.67232800 | 1.59989200  | 0.50102100  |
| C | -0.69966100 | 0.65780000  | 1.54169400  |
| C | -2.84969600 | 2.43954900  | 1.60371600  |
| C | -0.87459900 | 1.49507900  | 2.64563600  |
| H | 0.13042200  | -0.04002400 | 1.52502500  |
| C | -1.94927800 | 2.38007500  | 2.67139300  |
| H | -3.67472300 | 3.14171200  | 1.63660100  |
| H | -0.17566800 | 1.45149000  | 3.47537200  |
| H | -2.09599600 | 3.03803900  | 3.52394600  |
| C | 3.64049500  | -0.76440500 | 2.82046200  |
| H | 3.15505300  | -1.43018100 | 3.54627900  |
| H | 4.63714500  | -1.15309500 | 2.57837200  |
| H | 3.73483800  | 0.23219900  | 3.25542800  |
| C | -4.58312000 | 2.48606000  | -0.63919600 |
| H | -5.29317000 | 2.27828300  | 0.17209400  |
| H | -4.26177500 | 3.53392900  | -0.57973900 |
| H | -5.06905700 | 2.31176200  | -1.60061100 |

|   |             |             |             |
|---|-------------|-------------|-------------|
| O | 2.85300400  | -0.60434900 | 1.65015600  |
| O | -3.47467400 | 1.60187300  | -0.60067800 |

**2-THF**

0 1

|   |             |             |             |
|---|-------------|-------------|-------------|
| C | 2.68033800  | -1.68128600 | 0.82796900  |
| C | 2.99877300  | -2.99652600 | 1.18094600  |
| C | 2.71773200  | -4.03774300 | 0.29320400  |
| C | 2.11604100  | -3.78049500 | -0.93759800 |
| C | 1.80779600  | -2.46586700 | -1.28913000 |
| C | 2.10083500  | -1.40371500 | -0.42735100 |
| H | 3.45173000  | -3.21663800 | 2.14078100  |
| H | 2.96637600  | -5.05686000 | 0.57739400  |
| H | 1.89323800  | -4.59254200 | -1.62296300 |
| H | 1.34110400  | -2.25208400 | -2.24530300 |
| C | 1.83498100  | 0.00186000  | -0.84051200 |
| C | 3.01113800  | 0.94453900  | -0.87162300 |
| C | 3.73206100  | 3.17687100  | -1.10712900 |
| H | 4.35079900  | 3.10148600  | -0.20655100 |
| H | 4.36113800  | 2.90645900  | -1.96175300 |
| C | 3.11669400  | 4.55509500  | -1.26420600 |
| H | 2.48714700  | 4.80147100  | -0.40317700 |
| H | 3.90792400  | 5.30903100  | -1.34261200 |
| H | 2.49906200  | 4.60538100  | -2.16647100 |
| C | -1.42347100 | -0.19286700 | -0.71927300 |
| C | -2.56173400 | -1.06828900 | -1.19056300 |
| O | 4.16281700  | 0.56561200  | -0.79765600 |
| O | 2.64684500  | 2.23002700  | -1.00747200 |
| N | 0.70629000  | 0.47171600  | -1.24522000 |

|   |             |             |             |
|---|-------------|-------------|-------------|
| N | -0.35547700 | -0.31604100 | -1.42763300 |
| C | -4.52717100 | -2.18418100 | -0.50100000 |
| H | -4.16383600 | -3.12059400 | -0.93671600 |
| H | -5.12262900 | -1.67481400 | -1.26628400 |
| C | -5.31464200 | -2.41616300 | 0.77547100  |
| H | -6.18864400 | -3.04263500 | 0.56545200  |
| H | -4.69982600 | -2.92207500 | 1.52685200  |
| H | -5.66233900 | -1.46823400 | 1.19886400  |
| O | -2.69571100 | -1.49255800 | -2.31592700 |
| O | -3.39510300 | -1.35441800 | -0.16772300 |
| C | -1.59141900 | 0.68793900  | 0.46508500  |
| C | -2.67232800 | 1.59989200  | 0.50102100  |
| C | -0.69966100 | 0.65780000  | 1.54169400  |
| C | -2.84969600 | 2.43954900  | 1.60371600  |
| C | -0.87459900 | 1.49507900  | 2.64563600  |
| H | 0.13042200  | -0.04002400 | 1.52502500  |
| C | -1.94927800 | 2.38007500  | 2.67139300  |
| H | -3.67472300 | 3.14171200  | 1.63660100  |
| H | -0.17566800 | 1.45149000  | 3.47537200  |
| H | -2.09599600 | 3.03803900  | 3.52394600  |
| C | 3.64049500  | -0.76440500 | 2.82046200  |
| H | 3.15505300  | -1.43018100 | 3.54627900  |
| H | 4.63714500  | -1.15309500 | 2.57837200  |
| H | 3.73483800  | 0.23219900  | 3.25542800  |
| C | -4.58312000 | 2.48606000  | -0.63919600 |
| H | -5.29317000 | 2.27828300  | 0.17209400  |
| H | -4.26177500 | 3.53392900  | -0.57973900 |
| H | -5.06905700 | 2.31176200  | -1.60061100 |

|   |             |             |             |
|---|-------------|-------------|-------------|
| O | 2.85300400  | -0.60434900 | 1.65015600  |
| O | -3.47467400 | 1.60187300  | -0.60067800 |

## 2-Hexane

0 1

|   |             |             |             |
|---|-------------|-------------|-------------|
| C | 2.68033800  | -1.68128600 | 0.82796900  |
| C | 2.99877300  | -2.99652600 | 1.18094600  |
| C | 2.71773200  | -4.03774300 | 0.29320400  |
| C | 2.11604100  | -3.78049500 | -0.93759800 |
| C | 1.80779600  | -2.46586700 | -1.28913000 |
| C | 2.10083500  | -1.40371500 | -0.42735100 |
| H | 3.45173000  | -3.21663800 | 2.14078100  |
| H | 2.96637600  | -5.05686000 | 0.57739400  |
| H | 1.89323800  | -4.59254200 | -1.62296300 |
| H | 1.34110400  | -2.25208400 | -2.24530300 |
| C | 1.83498100  | 0.00186000  | -0.84051200 |
| C | 3.01113800  | 0.94453900  | -0.87162300 |
| C | 3.73206100  | 3.17687100  | -1.10712900 |
| H | 4.35079900  | 3.10148600  | -0.20655100 |
| H | 4.36113800  | 2.90645900  | -1.96175300 |
| C | 3.11669400  | 4.55509500  | -1.26420600 |
| H | 2.48714700  | 4.80147100  | -0.40317700 |
| H | 3.90792400  | 5.30903100  | -1.34261200 |
| H | 2.49906200  | 4.60538100  | -2.16647100 |
| C | -1.42347100 | -0.19286700 | -0.71927300 |
| C | -2.56173400 | -1.06828900 | -1.19056300 |
| O | 4.16281700  | 0.56561200  | -0.79765600 |
| O | 2.64684500  | 2.23002700  | -1.00747200 |
| N | 0.70629000  | 0.47171600  | -1.24522000 |

|   |             |             |             |
|---|-------------|-------------|-------------|
| N | -0.35547700 | -0.31604100 | -1.42763300 |
| C | -4.52717100 | -2.18418100 | -0.50100000 |
| H | -4.16383600 | -3.12059400 | -0.93671600 |
| H | -5.12262900 | -1.67481400 | -1.26628400 |
| C | -5.31464200 | -2.41616300 | 0.77547100  |
| H | -6.18864400 | -3.04263500 | 0.56545200  |
| H | -4.69982600 | -2.92207500 | 1.52685200  |
| H | -5.66233900 | -1.46823400 | 1.19886400  |
| O | -2.69571100 | -1.49255800 | -2.31592700 |
| O | -3.39510300 | -1.35441800 | -0.16772300 |
| C | -1.59141900 | 0.68793900  | 0.46508500  |
| C | -2.67232800 | 1.59989200  | 0.50102100  |
| C | -0.69966100 | 0.65780000  | 1.54169400  |
| C | -2.84969600 | 2.43954900  | 1.60371600  |
| C | -0.87459900 | 1.49507900  | 2.64563600  |
| H | 0.13042200  | -0.04002400 | 1.52502500  |
| C | -1.94927800 | 2.38007500  | 2.67139300  |
| H | -3.67472300 | 3.14171200  | 1.63660100  |
| H | -0.17566800 | 1.45149000  | 3.47537200  |
| H | -2.09599600 | 3.03803900  | 3.52394600  |
| C | 3.64049500  | -0.76440500 | 2.82046200  |
| H | 3.15505300  | -1.43018100 | 3.54627900  |
| H | 4.63714500  | -1.15309500 | 2.57837200  |
| H | 3.73483800  | 0.23219900  | 3.25542800  |
| C | -4.58312000 | 2.48606000  | -0.63919600 |
| H | -5.29317000 | 2.27828300  | 0.17209400  |
| H | -4.26177500 | 3.53392900  | -0.57973900 |
| H | -5.06905700 | 2.31176200  | -1.60061100 |

|   |             |             |             |
|---|-------------|-------------|-------------|
| O | 2.85300400  | -0.60434900 | 1.65015600  |
| O | -3.47467400 | 1.60187300  | -0.60067800 |

### 3- CH3OH

0 1

|   |             |             |             |
|---|-------------|-------------|-------------|
| C | 0.04338395  | 0.44468546  | 0.00000000  |
| C | -0.71981905 | 1.32249246  | 0.92287300  |
| C | -2.10821405 | 1.49950746  | 0.76586800  |
| C | -0.07232405 | 1.99877646  | 1.97473200  |
| C | -2.82424305 | 2.33509946  | 1.61843200  |
| H | -2.63516605 | 0.98359246  | -0.02859400 |
| C | -0.78330105 | 2.82147446  | 2.84372900  |
| H | 0.99593995  | 1.89054346  | 2.10919400  |
| C | -2.15027505 | 2.98134946  | 2.64896500  |
| H | -3.89184205 | 2.48589146  | 1.49763600  |
| H | -0.29202305 | 3.34071446  | 3.65979100  |
| N | -0.39445705 | -0.60627354 | -0.61340800 |
| N | -1.64672005 | -1.01381454 | -0.61339700 |
| C | -2.08454505 | -2.06477054 | 0.00002800  |
| C | -1.32132405 | -2.94256054 | 0.92290600  |
| C | -1.96879605 | -3.61877654 | 1.97482200  |
| C | 0.06705695  | -3.11962754 | 0.76584800  |
| C | -1.25781005 | -4.44145954 | 2.84382600  |
| H | -3.03705005 | -3.51049754 | 2.10933400  |
| C | 0.78309495  | -3.95520654 | 1.61841900  |
| H | 0.59399495  | -2.60376854 | -0.02865900 |
| C | 0.10914995  | -4.60138854 | 2.64901000  |
| H | -1.74907105 | -4.96064654 | 3.65993100  |
| H | 1.85068295  | -4.10604254 | 1.49758200  |

|   |             |             |             |
|---|-------------|-------------|-------------|
| C | -3.52171905 | -2.41128854 | -0.31694300 |
| O | -4.03814205 | -3.47681754 | -0.04200600 |
| C | 1.48055995  | 0.79118046  | -0.31699200 |
| O | 1.99700995  | 1.85669446  | -0.04204700 |
| C | 3.49458995  | 0.07063946  | -1.31840300 |
| H | 3.50131095  | 0.94007546  | -1.98350300 |
| O | 2.12739995  | -0.21073954 | -0.93689700 |
| C | 4.04133895  | -1.17173254 | -1.99569900 |
| H | 4.02424295  | -2.02907654 | -1.31502700 |
| H | 3.45339195  | -1.42430454 | -2.88370700 |
| H | 5.07791195  | -0.99842554 | -2.30477400 |
| O | -4.16858105 | -1.40938154 | -0.93684500 |
| C | -5.53575305 | -1.69080254 | -1.31838100 |
| H | -5.54243605 | -2.56025554 | -1.98345900 |
| C | -6.08251605 | -0.44845954 | -1.99572000 |
| H | -6.06545705 | 0.40890146  | -1.31506800 |
| H | -5.49455405 | -0.19589454 | -2.88371900 |
| H | -7.11907805 | -0.62179954 | -2.30481500 |
| F | -2.84266005 | 3.78029846  | 3.48392100  |
| F | 0.80154395  | -5.40032954 | 3.48396700  |
| H | 4.06236495  | 0.33668646  | -0.42090200 |
| H | -6.10354305 | -1.95684154 | -0.42088700 |

### 3- CH3CN

0 1

|   |             |            |            |
|---|-------------|------------|------------|
| C | -1.60520615 | 0.63991322 | 0.00000000 |
| C | -2.36840915 | 1.51772022 | 0.92287300 |
| C | -3.75680415 | 1.69473522 | 0.76586800 |
| C | -1.72091415 | 2.19400422 | 1.97473200 |

|   |             |             |             |
|---|-------------|-------------|-------------|
| C | -4.47283315 | 2.53032722  | 1.61843200  |
| H | -4.28375615 | 1.17882022  | -0.02859400 |
| C | -2.43189115 | 3.01670222  | 2.84372900  |
| H | -0.65265015 | 2.08577122  | 2.10919400  |
| C | -3.79886515 | 3.17657722  | 2.64896500  |
| H | -5.54043215 | 2.68111922  | 1.49763600  |
| H | -1.94061315 | 3.53594222  | 3.65979100  |
| N | -2.04304715 | -0.41104578 | -0.61340800 |
| N | -3.29531015 | -0.81858678 | -0.61339700 |
| C | -3.73313515 | -1.86954278 | 0.00002800  |
| C | -2.96991415 | -2.74733278 | 0.92290600  |
| C | -3.61738615 | -3.42354878 | 1.97482200  |
| C | -1.58153315 | -2.92439978 | 0.76584800  |
| C | -2.90640015 | -4.24623178 | 2.84382600  |
| H | -4.68564015 | -3.31526978 | 2.10933400  |
| C | -0.86549515 | -3.75997878 | 1.61841900  |
| H | -1.05459515 | -2.40854078 | -0.02865900 |
| C | -1.53944015 | -4.40616078 | 2.64901000  |
| H | -3.39766115 | -4.76541878 | 3.65993100  |
| H | 0.20209285  | -3.91081478 | 1.49758200  |
| C | -5.17030915 | -2.21606078 | -0.31694300 |
| O | -5.68673215 | -3.28158978 | -0.04200600 |
| C | -0.16803015 | 0.98640822  | -0.31699200 |
| O | 0.34841985  | 2.05192222  | -0.04204700 |
| C | 1.84599985  | 0.26586722  | -1.31840300 |
| H | 1.85272085  | 1.13530322  | -1.98350300 |
| O | 0.47880985  | -0.01551178 | -0.93689700 |
| C | 2.39274885  | -0.97650478 | -1.99569900 |

|   |             |             |             |
|---|-------------|-------------|-------------|
| H | 2.37565285  | -1.83384878 | -1.31502700 |
| H | 1.80480185  | -1.22907678 | -2.88370700 |
| H | 3.42932185  | -0.80319778 | -2.30477400 |
| O | -5.81717115 | -1.21415378 | -0.93684500 |
| C | -7.18434315 | -1.49557478 | -1.31838100 |
| H | -7.19102615 | -2.36502778 | -1.98345900 |
| C | -7.73110615 | -0.25323178 | -1.99572000 |
| H | -7.71404715 | 0.60412922  | -1.31506800 |
| H | -7.14314415 | -0.00066678 | -2.88371900 |
| H | -8.76766815 | -0.42657178 | -2.30481500 |
| F | -4.49125015 | 3.97552622  | 3.48392100  |
| F | -0.84704615 | -5.20510178 | 3.48396700  |
| H | 2.41377485  | 0.53191422  | -0.42090200 |
| H | -7.75213315 | -1.76161378 | -0.42088700 |

### 3-DMSO

0 1

|   |             |            |             |
|---|-------------|------------|-------------|
| C | 1.06395800  | 1.25473100 | -0.59824400 |
| C | 0.30075500  | 2.13253800 | 0.32462900  |
| C | -1.08764000 | 2.30955300 | 0.16762400  |
| C | 0.94825000  | 2.80882200 | 1.37648800  |
| C | -1.80366900 | 3.14514500 | 1.02018800  |
| H | -1.61459200 | 1.79363800 | -0.62683800 |
| C | 0.23727300  | 3.63152000 | 2.24548500  |
| H | 2.01651400  | 2.70058900 | 1.51095000  |
| C | -1.12970100 | 3.79139500 | 2.05072100  |
| H | -2.87126800 | 3.29593700 | 0.89939200  |
| H | 0.72855100  | 4.15076000 | 3.06154700  |
| N | 0.62611700  | 0.20377200 | -1.21165200 |

|   |             |             |             |
|---|-------------|-------------|-------------|
| N | -0.62614600 | -0.20376900 | -1.21164100 |
| C | -1.06397100 | -1.25472500 | -0.59821600 |
| C | -0.30075000 | -2.13251500 | 0.32466200  |
| C | -0.94822200 | -2.80873100 | 1.37657800  |
| C | 1.08763100  | -2.30958200 | 0.16760400  |
| C | -0.23723600 | -3.63141400 | 2.24558200  |
| H | -2.01647600 | -2.70045200 | 1.51109000  |
| C | 1.80366900  | -3.14516100 | 1.02017500  |
| H | 1.61456900  | -1.79372300 | -0.62690300 |
| C | 1.12972400  | -3.79134300 | 2.05076600  |
| H | -0.72849700 | -4.15060100 | 3.06168700  |
| H | 2.87125700  | -3.29599700 | 0.89933800  |
| C | -2.50114500 | -1.60124300 | -0.91518700 |
| O | -3.01756800 | -2.66677200 | -0.64025000 |
| C | 2.50113400  | 1.60122600  | -0.91523600 |
| O | 3.01758400  | 2.66674000  | -0.64029100 |
| C | 4.51516400  | 0.88068500  | -1.91664700 |
| H | 4.52188500  | 1.75012100  | -2.58174700 |
| O | 3.14797400  | 0.59930600  | -1.53514100 |
| C | 5.06191300  | -0.36168700 | -2.59394300 |
| H | 5.04481700  | -1.21903100 | -1.91327100 |
| H | 4.47396600  | -0.61425900 | -3.48195100 |
| H | 6.09848600  | -0.18838000 | -2.90301800 |
| O | -3.14800700 | -0.59933600 | -1.53508900 |
| C | -4.51517900 | -0.88075700 | -1.91662500 |
| H | -4.52186200 | -1.75021000 | -2.58170300 |
| C | -5.06194200 | 0.36158600  | -2.59396400 |
| H | -5.04488300 | 1.21894700  | -1.91331200 |

|   |             |             |             |
|---|-------------|-------------|-------------|
| H | -4.47398000 | 0.61415100  | -3.48196300 |
| H | -6.09850400 | 0.18824600  | -2.90305900 |
| F | -1.82208600 | 4.59034400  | 2.88567700  |
| F | 1.82211800  | -4.59028400 | 2.88572300  |
| H | 5.08293900  | 1.14673200  | -1.01914600 |
| H | -5.08296900 | -1.14679600 | -1.01913100 |

### 3-DCM

0 1

|   |             |             |             |
|---|-------------|-------------|-------------|
| C | 1.06395800  | 1.25473100  | -0.59824400 |
| C | 0.30075500  | 2.13253800  | 0.32462900  |
| C | -1.08764000 | 2.30955300  | 0.16762400  |
| C | 0.94825000  | 2.80882200  | 1.37648800  |
| C | -1.80366900 | 3.14514500  | 1.02018800  |
| H | -1.61459200 | 1.79363800  | -0.62683800 |
| C | 0.23727300  | 3.63152000  | 2.24548500  |
| H | 2.01651400  | 2.70058900  | 1.51095000  |
| C | -1.12970100 | 3.79139500  | 2.05072100  |
| H | -2.87126800 | 3.29593700  | 0.89939200  |
| H | 0.72855100  | 4.15076000  | 3.06154700  |
| N | 0.62611700  | 0.20377200  | -1.21165200 |
| N | -0.62614600 | -0.20376900 | -1.21164100 |
| C | -1.06397100 | -1.25472500 | -0.59821600 |
| C | -0.30075000 | -2.13251500 | 0.32466200  |
| C | -0.94822200 | -2.80873100 | 1.37657800  |
| C | 1.08763100  | -2.30958200 | 0.16760400  |
| C | -0.23723600 | -3.63141400 | 2.24558200  |
| H | -2.01647600 | -2.70045200 | 1.51109000  |

|   |             |             |             |
|---|-------------|-------------|-------------|
| C | 1.80366900  | -3.14516100 | 1.02017500  |
| H | 1.61456900  | -1.79372300 | -0.62690300 |
| C | 1.12972400  | -3.79134300 | 2.05076600  |
| H | -0.72849700 | -4.15060100 | 3.06168700  |
| H | 2.87125700  | -3.29599700 | 0.89933800  |
| C | -2.50114500 | -1.60124300 | -0.91518700 |
| O | -3.01756800 | -2.66677200 | -0.64025000 |
| C | 2.50113400  | 1.60122600  | -0.91523600 |
| O | 3.01758400  | 2.66674000  | -0.64029100 |
| C | 4.51516400  | 0.88068500  | -1.91664700 |
| H | 4.52188500  | 1.75012100  | -2.58174700 |
| O | 3.14797400  | 0.59930600  | -1.53514100 |
| C | 5.06191300  | -0.36168700 | -2.59394300 |
| H | 5.04481700  | -1.21903100 | -1.91327100 |
| H | 4.47396600  | -0.61425900 | -3.48195100 |
| H | 6.09848600  | -0.18838000 | -2.90301800 |
| O | -3.14800700 | -0.59933600 | -1.53508900 |
| C | -4.51517900 | -0.88075700 | -1.91662500 |
| H | -4.52186200 | -1.75021000 | -2.58170300 |
| C | -5.06194200 | 0.36158600  | -2.59396400 |
| H | -5.04488300 | 1.21894700  | -1.91331200 |
| H | -4.47398000 | 0.61415100  | -3.48196300 |
| H | -6.09850400 | 0.18824600  | -2.90305900 |
| F | -1.82208600 | 4.59034400  | 2.88567700  |
| F | 1.82211800  | -4.59028400 | 2.88572300  |
| H | 5.08293900  | 1.14673200  | -1.01914600 |
| H | -5.08296900 | -1.14679600 | -1.01913100 |

### 3-THF

0 1

|   |             |             |             |
|---|-------------|-------------|-------------|
| C | 1.06395800  | 1.25473100  | -0.59824400 |
| C | 0.30075500  | 2.13253800  | 0.32462900  |
| C | -1.08764000 | 2.30955300  | 0.16762400  |
| C | 0.94825000  | 2.80882200  | 1.37648800  |
| C | -1.80366900 | 3.14514500  | 1.02018800  |
| H | -1.61459200 | 1.79363800  | -0.62683800 |
| C | 0.23727300  | 3.63152000  | 2.24548500  |
| H | 2.01651400  | 2.70058900  | 1.51095000  |
| C | -1.12970100 | 3.79139500  | 2.05072100  |
| H | -2.87126800 | 3.29593700  | 0.89939200  |
| H | 0.72855100  | 4.15076000  | 3.06154700  |
| N | 0.62611700  | 0.20377200  | -1.21165200 |
| N | -0.62614600 | -0.20376900 | -1.21164100 |
| C | -1.06397100 | -1.25472500 | -0.59821600 |
| C | -0.30075000 | -2.13251500 | 0.32466200  |
| C | -0.94822200 | -2.80873100 | 1.37657800  |
| C | 1.08763100  | -2.30958200 | 0.16760400  |
| C | -0.23723600 | -3.63141400 | 2.24558200  |
| H | -2.01647600 | -2.70045200 | 1.51109000  |
| C | 1.80366900  | -3.14516100 | 1.02017500  |
| H | 1.61456900  | -1.79372300 | -0.62690300 |
| C | 1.12972400  | -3.79134300 | 2.05076600  |
| H | -0.72849700 | -4.15060100 | 3.06168700  |
| H | 2.87125700  | -3.29599700 | 0.89933800  |
| C | -2.50114500 | -1.60124300 | -0.91518700 |
| O | -3.01756800 | -2.66677200 | -0.64025000 |
| C | 2.50113400  | 1.60122600  | -0.91523600 |

|   |             |             |             |
|---|-------------|-------------|-------------|
| O | 3.01758400  | 2.66674000  | -0.64029100 |
| C | 4.51516400  | 0.88068500  | -1.91664700 |
| H | 4.52188500  | 1.75012100  | -2.58174700 |
| O | 3.14797400  | 0.59930600  | -1.53514100 |
| C | 5.06191300  | -0.36168700 | -2.59394300 |
| H | 5.04481700  | -1.21903100 | -1.91327100 |
| H | 4.47396600  | -0.61425900 | -3.48195100 |
| H | 6.09848600  | -0.18838000 | -2.90301800 |
| O | -3.14800700 | -0.59933600 | -1.53508900 |
| C | -4.51517900 | -0.88075700 | -1.91662500 |
| H | -4.52186200 | -1.75021000 | -2.58170300 |
| C | -5.06194200 | 0.36158600  | -2.59396400 |
| H | -5.04488300 | 1.21894700  | -1.91331200 |
| H | -4.47398000 | 0.61415100  | -3.48196300 |
| H | -6.09850400 | 0.18824600  | -2.90305900 |
| F | -1.82208600 | 4.59034400  | 2.88567700  |
| F | 1.82211800  | -4.59028400 | 2.88572300  |
| H | 5.08293900  | 1.14673200  | -1.01914600 |
| H | -5.08296900 | -1.14679600 | -1.01913100 |

### 3-Hexane

0 1

|   |             |            |             |
|---|-------------|------------|-------------|
| C | 1.06395800  | 1.25473100 | -0.59824400 |
| C | 0.30075500  | 2.13253800 | 0.32462900  |
| C | -1.08764000 | 2.30955300 | 0.16762400  |
| C | 0.94825000  | 2.80882200 | 1.37648800  |
| C | -1.80366900 | 3.14514500 | 1.02018800  |
| H | -1.61459200 | 1.79363800 | -0.62683800 |
| C | 0.23727300  | 3.63152000 | 2.24548500  |

|   |             |             |             |
|---|-------------|-------------|-------------|
| H | 2.01651400  | 2.70058900  | 1.51095000  |
| C | -1.12970100 | 3.79139500  | 2.05072100  |
| H | -2.87126800 | 3.29593700  | 0.89939200  |
| H | 0.72855100  | 4.15076000  | 3.06154700  |
| N | 0.62611700  | 0.20377200  | -1.21165200 |
| N | -0.62614600 | -0.20376900 | -1.21164100 |
| C | -1.06397100 | -1.25472500 | -0.59821600 |
| C | -0.30075000 | -2.13251500 | 0.32466200  |
| C | -0.94822200 | -2.80873100 | 1.37657800  |
| C | 1.08763100  | -2.30958200 | 0.16760400  |
| C | -0.23723600 | -3.63141400 | 2.24558200  |
| H | -2.01647600 | -2.70045200 | 1.51109000  |
| C | 1.80366900  | -3.14516100 | 1.02017500  |
| H | 1.61456900  | -1.79372300 | -0.62690300 |
| C | 1.12972400  | -3.79134300 | 2.05076600  |
| H | -0.72849700 | -4.15060100 | 3.06168700  |
| H | 2.87125700  | -3.29599700 | 0.89933800  |
| C | -2.50114500 | -1.60124300 | -0.91518700 |
| O | -3.01756800 | -2.66677200 | -0.64025000 |
| C | 2.50113400  | 1.60122600  | -0.91523600 |
| O | 3.01758400  | 2.66674000  | -0.64029100 |
| C | 4.51516400  | 0.88068500  | -1.91664700 |
| H | 4.52188500  | 1.75012100  | -2.58174700 |
| O | 3.14797400  | 0.59930600  | -1.53514100 |
| C | 5.06191300  | -0.36168700 | -2.59394300 |
| H | 5.04481700  | -1.21903100 | -1.91327100 |
| H | 4.47396600  | -0.61425900 | -3.48195100 |
| H | 6.09848600  | -0.18838000 | -2.90301800 |

|   |             |             |             |
|---|-------------|-------------|-------------|
| O | -3.14800700 | -0.59933600 | -1.53508900 |
| C | -4.51517900 | -0.88075700 | -1.91662500 |
| H | -4.52186200 | -1.75021000 | -2.58170300 |
| C | -5.06194200 | 0.36158600  | -2.59396400 |
| H | -5.04488300 | 1.21894700  | -1.91331200 |
| H | -4.47398000 | 0.61415100  | -3.48196300 |
| H | -6.09850400 | 0.18824600  | -2.90305900 |
| F | -1.82208600 | 4.59034400  | 2.88567700  |
| F | 1.82211800  | -4.59028400 | 2.88572300  |
| H | 5.08293900  | 1.14673200  | -1.01914600 |
| H | -5.08296900 | -1.14679600 | -1.01913100 |

#### 4- CH3OH

0 1

|   |             |             |             |
|---|-------------|-------------|-------------|
| C | -1.41373803 | -0.01597444 | 0.00000000  |
| C | -0.43590503 | 0.86944556  | -0.46653300 |
| C | 0.91274197  | 0.55336356  | -0.34372600 |
| C | 1.31294297  | -0.66044144 | 0.24764000  |
| C | 0.32487997  | -1.54456044 | 0.71157100  |
| C | -1.02700903 | -1.22069244 | 0.58632300  |
| H | -2.46711703 | 0.23332056  | -0.09530900 |
| H | -0.72758803 | 1.80959256  | -0.92717000 |
| H | 1.67582897  | 1.23556956  | -0.70321600 |
| H | 0.60968197  | -2.49418144 | 1.14924000  |
| H | -1.77835803 | -1.91829444 | 0.94624700  |
| C | 2.75548997  | -0.96324544 | 0.38661900  |
| C | 3.19254397  | -2.21037644 | 1.12925700  |
| C | 4.61171197  | -3.00393944 | 2.86884400  |
| H | 3.80476197  | -3.68014844 | 3.16519800  |

|   |             |             |             |
|---|-------------|-------------|-------------|
| H | 5.28008797  | -3.55097144 | 2.19608100  |
| C | 5.34839897  | -2.41537744 | 4.05691600  |
| H | 4.65320097  | -1.91197044 | 4.73656400  |
| H | 5.85240597  | -3.21575244 | 4.60986300  |
| H | 6.09364097  | -1.68432644 | 3.73114300  |
| O | 2.83566897  | -3.33581144 | 0.85248600  |
| O | 4.03666497  | -1.89627544 | 2.12417200  |
| N | 3.61491097  | -0.15972244 | -0.14001200 |
| C | 5.45738197  | 0.99500756  | 1.73897800  |
| C | 7.24673097  | -0.09519344 | 0.20779700  |
| C | 8.29475197  | 0.35069056  | 1.03163200  |
| C | 7.56962597  | -0.78170044 | -0.97918500 |
| C | 9.62345997  | 0.11172556  | 0.67678500  |
| H | 8.07315997  | 0.86754256  | 1.95669100  |
| C | 8.89497397  | -1.01848544 | -1.32548900 |
| H | 6.76501397  | -1.12150244 | -1.62208500 |
| C | 9.93116597  | -0.57219244 | -0.49853600 |
| H | 10.41938597 | 0.46240256  | 1.32830100  |
| H | 9.12200897  | -1.54936244 | -2.24618100 |
| H | 10.96694597 | -0.75584944 | -0.77125300 |
| C | 5.81887397  | 0.15271456  | 0.53165100  |
| N | 4.92230297  | -0.41139944 | -0.20475700 |
| C | 4.00325897  | 2.66730856  | 2.57557700  |
| H | 3.69056197  | 1.98587956  | 3.37242400  |
| O | 5.97554997  | 0.87224956  | 2.83196700  |
| O | 4.49058597  | 1.87710256  | 1.46145700  |
| C | 2.85644297  | 3.51576656  | 2.06076400  |
| H | 2.04930597  | 2.88574056  | 1.67387500  |

|   |            |            |            |
|---|------------|------------|------------|
| H | 2.45740897 | 4.12974356 | 2.87562600 |
| H | 3.19121697 | 4.18194956 | 1.25916400 |
| H | 4.83013297 | 3.27365656 | 2.95897200 |

#### 4-CH3CN

0 1

|   |             |             |             |
|---|-------------|-------------|-------------|
| C | -0.40734825 | -0.12779553 | 0.00000000  |
| C | 0.57048475  | 0.75762447  | -0.46653300 |
| C | 1.91913175  | 0.44154247  | -0.34372600 |
| C | 2.31933275  | -0.77226253 | 0.24764000  |
| C | 1.33126975  | -1.65638153 | 0.71157100  |
| C | -0.02061925 | -1.33251353 | 0.58632300  |
| H | -1.46072725 | 0.12149947  | -0.09530900 |
| H | 0.27880175  | 1.69777147  | -0.92717000 |
| H | 2.68221875  | 1.12374847  | -0.70321600 |
| H | 1.61607175  | -2.60600253 | 1.14924000  |
| H | -0.77196825 | -2.03011553 | 0.94624700  |
| C | 3.76187975  | -1.07506653 | 0.38661900  |
| C | 4.19893375  | -2.32219753 | 1.12925700  |
| C | 5.61810175  | -3.11576053 | 2.86884400  |
| H | 4.81115175  | -3.79196953 | 3.16519800  |
| H | 6.28647775  | -3.66279253 | 2.19608100  |
| C | 6.35478875  | -2.52719853 | 4.05691600  |
| H | 5.65959075  | -2.02379153 | 4.73656400  |
| H | 6.85879575  | -3.32757353 | 4.60986300  |
| H | 7.10003075  | -1.79614753 | 3.73114300  |
| O | 3.84205875  | -3.44763253 | 0.85248600  |
| O | 5.04305475  | -2.00809653 | 2.12417200  |
| N | 4.62130075  | -0.27154353 | -0.14001200 |

|   |             |             |             |
|---|-------------|-------------|-------------|
| C | 6.46377175  | 0.88318647  | 1.73897800  |
| C | 8.25312075  | -0.20701453 | 0.20779700  |
| C | 9.30114175  | 0.23886947  | 1.03163200  |
| C | 8.57601575  | -0.89352153 | -0.97918500 |
| C | 10.62984975 | -0.00009553 | 0.67678500  |
| H | 9.07954975  | 0.75572147  | 1.95669100  |
| C | 9.90136375  | -1.13030653 | -1.32548900 |
| H | 7.77140375  | -1.23332353 | -1.62208500 |
| C | 10.93755575 | -0.68401353 | -0.49853600 |
| H | 11.42577575 | 0.35058147  | 1.32830100  |
| H | 10.12839875 | -1.66118353 | -2.24618100 |
| H | 11.97333575 | -0.86767053 | -0.77125300 |
| C | 6.82526375  | 0.04089347  | 0.53165100  |
| N | 5.92869275  | -0.52322053 | -0.20475700 |
| C | 5.00964875  | 2.55548747  | 2.57557700  |
| H | 4.69695175  | 1.87405847  | 3.37242400  |
| O | 6.98193975  | 0.76042847  | 2.83196700  |
| O | 5.49697575  | 1.76528147  | 1.46145700  |
| C | 3.86283275  | 3.40394547  | 2.06076400  |
| H | 3.05569575  | 2.77391947  | 1.67387500  |
| H | 3.46379875  | 4.01792247  | 2.87562600  |
| H | 4.19760675  | 4.07012847  | 1.25916400  |
| H | 5.83652275  | 3.16183547  | 2.95897200  |

#### 4-DMSO

01

|   |             |            |             |
|---|-------------|------------|-------------|
| C | -5.68633100 | 0.28721700 | -0.94904700 |
| C | -4.70849800 | 1.17263700 | -1.41558000 |
| C | -3.35985100 | 0.85655500 | -1.29277300 |

|   |             |             |             |
|---|-------------|-------------|-------------|
| C | -2.95965000 | -0.35725000 | -0.70140700 |
| C | -3.94771300 | -1.24136900 | -0.23747600 |
| C | -5.29960200 | -0.91750100 | -0.36272400 |
| H | -6.73971000 | 0.53651200  | -1.04435600 |
| H | -5.00018100 | 2.11278400  | -1.87621700 |
| H | -2.59676400 | 1.53876100  | -1.65226300 |
| H | -3.66291100 | -2.19099000 | 0.20019300  |
| H | -6.05095100 | -1.61510300 | -0.00280000 |
| C | -1.51710300 | -0.66005400 | -0.56242800 |
| C | -1.08004900 | -1.90718500 | 0.18021000  |
| C | 0.33911900  | -2.70074800 | 1.91979700  |
| H | -0.46783100 | -3.37695700 | 2.21615100  |
| H | 1.00749500  | -3.24778000 | 1.24703400  |
| C | 1.07580600  | -2.11218600 | 3.10786900  |
| H | 0.38060800  | -1.60877900 | 3.78751700  |
| H | 1.57981300  | -2.91256100 | 3.66081600  |
| H | 1.82104800  | -1.38113500 | 2.78209600  |
| O | -1.43692400 | -3.03262000 | -0.09656100 |
| O | -0.23592800 | -1.59308400 | 1.17512500  |
| N | -0.65768200 | 0.14346900  | -1.08905900 |
| C | 1.18478900  | 1.29819900  | 0.78993100  |
| C | 2.97413800  | 0.20799800  | -0.74125000 |
| C | 4.02215900  | 0.65388200  | 0.08258500  |
| C | 3.29703300  | -0.47850900 | -1.92823200 |
| C | 5.35086700  | 0.41491700  | -0.27226200 |
| H | 3.80056700  | 1.17073400  | 1.00764400  |
| C | 4.62238100  | -0.71529400 | -2.27453600 |
| H | 2.49242100  | -0.81831100 | -2.57113200 |

|   |             |             |             |
|---|-------------|-------------|-------------|
| C | 5.65857300  | -0.26900100 | -1.44758300 |
| H | 6.14679300  | 0.76559400  | 0.37925400  |
| H | 4.84941600  | -1.24617100 | -3.19522800 |
| H | 6.69435300  | -0.45265800 | -1.72030000 |
| C | 1.54628100  | 0.45590600  | -0.41739600 |
| N | 0.64971000  | -0.10820800 | -1.15380400 |
| C | -0.26933400 | 2.97050000  | 1.62653000  |
| H | -0.58203100 | 2.28907100  | 2.42337700  |
| O | 1.70295700  | 1.17544100  | 1.88292000  |
| O | 0.21799300  | 2.18029400  | 0.51241000  |
| C | -1.41615000 | 3.81895800  | 1.11171700  |
| H | -2.22328700 | 3.18893200  | 0.72482800  |
| H | -1.81518400 | 4.43293500  | 1.92657900  |
| H | -1.08137600 | 4.48514100  | 0.31011700  |
| H | 0.55754000  | 3.57684800  | 2.00992500  |

#### **4-DCM**

0 1

|   |             |             |             |
|---|-------------|-------------|-------------|
| C | -5.68633100 | 0.28721700  | -0.94904700 |
| C | -4.70849800 | 1.17263700  | -1.41558000 |
| C | -3.35985100 | 0.85655500  | -1.29277300 |
| C | -2.95965000 | -0.35725000 | -0.70140700 |
| C | -3.94771300 | -1.24136900 | -0.23747600 |
| C | -5.29960200 | -0.91750100 | -0.36272400 |
| H | -6.73971000 | 0.53651200  | -1.04435600 |
| H | -5.00018100 | 2.11278400  | -1.87621700 |
| H | -2.59676400 | 1.53876100  | -1.65226300 |
| H | -3.66291100 | -2.19099000 | 0.20019300  |
| H | -6.05095100 | -1.61510300 | -0.00280000 |

|   |             |             |             |
|---|-------------|-------------|-------------|
| C | -1.51710300 | -0.66005400 | -0.56242800 |
| C | -1.08004900 | -1.90718500 | 0.18021000  |
| C | 0.33911900  | -2.70074800 | 1.91979700  |
| H | -0.46783100 | -3.37695700 | 2.21615100  |
| H | 1.00749500  | -3.24778000 | 1.24703400  |
| C | 1.07580600  | -2.11218600 | 3.10786900  |
| H | 0.38060800  | -1.60877900 | 3.78751700  |
| H | 1.57981300  | -2.91256100 | 3.66081600  |
| H | 1.82104800  | -1.38113500 | 2.78209600  |
| O | -1.43692400 | -3.03262000 | -0.09656100 |
| O | -0.23592800 | -1.59308400 | 1.17512500  |
| N | -0.65768200 | 0.14346900  | -1.08905900 |
| C | 1.18478900  | 1.29819900  | 0.78993100  |
| C | 2.97413800  | 0.20799800  | -0.74125000 |
| C | 4.02215900  | 0.65388200  | 0.08258500  |
| C | 3.29703300  | -0.47850900 | -1.92823200 |
| C | 5.35086700  | 0.41491700  | -0.27226200 |
| H | 3.80056700  | 1.17073400  | 1.00764400  |
| C | 4.62238100  | -0.71529400 | -2.27453600 |
| H | 2.49242100  | -0.81831100 | -2.57113200 |
| C | 5.65857300  | -0.26900100 | -1.44758300 |
| H | 6.14679300  | 0.76559400  | 0.37925400  |
| H | 4.84941600  | -1.24617100 | -3.19522800 |
| H | 6.69435300  | -0.45265800 | -1.72030000 |
| C | 1.54628100  | 0.45590600  | -0.41739600 |
| N | 0.64971000  | -0.10820800 | -1.15380400 |
| C | -0.26933400 | 2.97050000  | 1.62653000  |
| H | -0.58203100 | 2.28907100  | 2.42337700  |

|   |             |            |            |
|---|-------------|------------|------------|
| O | 1.70295700  | 1.17544100 | 1.88292000 |
| O | 0.21799300  | 2.18029400 | 0.51241000 |
| C | -1.41615000 | 3.81895800 | 1.11171700 |
| H | -2.22328700 | 3.18893200 | 0.72482800 |
| H | -1.81518400 | 4.43293500 | 1.92657900 |
| H | -1.08137600 | 4.48514100 | 0.31011700 |
| H | 0.55754000  | 3.57684800 | 2.00992500 |

#### 4-THF

0 1

|   |             |             |             |
|---|-------------|-------------|-------------|
| C | -5.68633100 | 0.28721700  | -0.94904700 |
| C | -4.70849800 | 1.17263700  | -1.41558000 |
| C | -3.35985100 | 0.85655500  | -1.29277300 |
| C | -2.95965000 | -0.35725000 | -0.70140700 |
| C | -3.94771300 | -1.24136900 | -0.23747600 |
| C | -5.29960200 | -0.91750100 | -0.36272400 |
| H | -6.73971000 | 0.53651200  | -1.04435600 |
| H | -5.00018100 | 2.11278400  | -1.87621700 |
| H | -2.59676400 | 1.53876100  | -1.65226300 |
| H | -3.66291100 | -2.19099000 | 0.20019300  |
| H | -6.05095100 | -1.61510300 | -0.00280000 |
| C | -1.51710300 | -0.66005400 | -0.56242800 |
| C | -1.08004900 | -1.90718500 | 0.18021000  |
| C | 0.33911900  | -2.70074800 | 1.91979700  |
| H | -0.46783100 | -3.37695700 | 2.21615100  |
| H | 1.00749500  | -3.24778000 | 1.24703400  |
| C | 1.07580600  | -2.11218600 | 3.10786900  |
| H | 0.38060800  | -1.60877900 | 3.78751700  |
| H | 1.57981300  | -2.91256100 | 3.66081600  |

|   |             |             |             |
|---|-------------|-------------|-------------|
| H | 1.82104800  | -1.38113500 | 2.78209600  |
| O | -1.43692400 | -3.03262000 | -0.09656100 |
| O | -0.23592800 | -1.59308400 | 1.17512500  |
| N | -0.65768200 | 0.14346900  | -1.08905900 |
| C | 1.18478900  | 1.29819900  | 0.78993100  |
| C | 2.97413800  | 0.20799800  | -0.74125000 |
| C | 4.02215900  | 0.65388200  | 0.08258500  |
| C | 3.29703300  | -0.47850900 | -1.92823200 |
| C | 5.35086700  | 0.41491700  | -0.27226200 |
| H | 3.80056700  | 1.17073400  | 1.00764400  |
| C | 4.62238100  | -0.71529400 | -2.27453600 |
| H | 2.49242100  | -0.81831100 | -2.57113200 |
| C | 5.65857300  | -0.26900100 | -1.44758300 |
| H | 6.14679300  | 0.76559400  | 0.37925400  |
| H | 4.84941600  | -1.24617100 | -3.19522800 |
| H | 6.69435300  | -0.45265800 | -1.72030000 |
| C | 1.54628100  | 0.45590600  | -0.41739600 |
| N | 0.64971000  | -0.10820800 | -1.15380400 |
| C | -0.26933400 | 2.97050000  | 1.62653000  |
| H | -0.58203100 | 2.28907100  | 2.42337700  |
| O | 1.70295700  | 1.17544100  | 1.88292000  |
| O | 0.21799300  | 2.18029400  | 0.51241000  |
| C | -1.41615000 | 3.81895800  | 1.11171700  |
| H | -2.22328700 | 3.18893200  | 0.72482800  |
| H | -1.81518400 | 4.43293500  | 1.92657900  |
| H | -1.08137600 | 4.48514100  | 0.31011700  |
| H | 0.55754000  | 3.57684800  | 2.00992500  |

**4-Hexane**

0 1

|   |             |             |             |
|---|-------------|-------------|-------------|
| C | -5.68633100 | 0.28721700  | -0.94904700 |
| C | -4.70849800 | 1.17263700  | -1.41558000 |
| C | -3.35985100 | 0.85655500  | -1.29277300 |
| C | -2.95965000 | -0.35725000 | -0.70140700 |
| C | -3.94771300 | -1.24136900 | -0.23747600 |
| C | -5.29960200 | -0.91750100 | -0.36272400 |
| H | -6.73971000 | 0.53651200  | -1.04435600 |
| H | -5.00018100 | 2.11278400  | -1.87621700 |
| H | -2.59676400 | 1.53876100  | -1.65226300 |
| H | -3.66291100 | -2.19099000 | 0.20019300  |
| H | -6.05095100 | -1.61510300 | -0.00280000 |
| C | -1.51710300 | -0.66005400 | -0.56242800 |
| C | -1.08004900 | -1.90718500 | 0.18021000  |
| C | 0.33911900  | -2.70074800 | 1.91979700  |
| H | -0.46783100 | -3.37695700 | 2.21615100  |
| H | 1.00749500  | -3.24778000 | 1.24703400  |
| C | 1.07580600  | -2.11218600 | 3.10786900  |
| H | 0.38060800  | -1.60877900 | 3.78751700  |
| H | 1.57981300  | -2.91256100 | 3.66081600  |
| H | 1.82104800  | -1.38113500 | 2.78209600  |
| O | -1.43692400 | -3.03262000 | -0.09656100 |
| O | -0.23592800 | -1.59308400 | 1.17512500  |
| N | -0.65768200 | 0.14346900  | -1.08905900 |
| C | 1.18478900  | 1.29819900  | 0.78993100  |
| C | 2.97413800  | 0.20799800  | -0.74125000 |
| C | 4.02215900  | 0.65388200  | 0.08258500  |
| C | 3.29703300  | -0.47850900 | -1.92823200 |

|   |             |             |             |
|---|-------------|-------------|-------------|
| C | 5.35086700  | 0.41491700  | -0.27226200 |
| H | 3.80056700  | 1.17073400  | 1.00764400  |
| C | 4.62238100  | -0.71529400 | -2.27453600 |
| H | 2.49242100  | -0.81831100 | -2.57113200 |
| C | 5.65857300  | -0.26900100 | -1.44758300 |
| H | 6.14679300  | 0.76559400  | 0.37925400  |
| H | 4.84941600  | -1.24617100 | -3.19522800 |
| H | 6.69435300  | -0.45265800 | -1.72030000 |
| C | 1.54628100  | 0.45590600  | -0.41739600 |
| N | 0.64971000  | -0.10820800 | -1.15380400 |
| C | -0.26933400 | 2.97050000  | 1.62653000  |
| H | -0.58203100 | 2.28907100  | 2.42337700  |
| O | 1.70295700  | 1.17544100  | 1.88292000  |
| O | 0.21799300  | 2.18029400  | 0.51241000  |
| C | -1.41615000 | 3.81895800  | 1.11171700  |
| H | -2.22328700 | 3.18893200  | 0.72482800  |
| H | -1.81518400 | 4.43293500  | 1.92657900  |
| H | -1.08137600 | 4.48514100  | 0.31011700  |
| H | 0.55754000  | 3.57684800  | 2.00992500  |
